# Supplementary material for: Orphan GPR110 (ADGRF1) targeted by N-docosahexaenoylethanolamine in development of neurons and cognitive function
Source: PubMed Central journal article supplement (PMC5075789; doi:10.1038/ncomms13123), 2016-10-19
Supplement: ncomms13123-s1.pdf [file ncomms13123-s1.pdf]

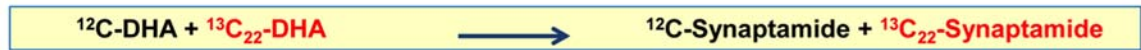

a.

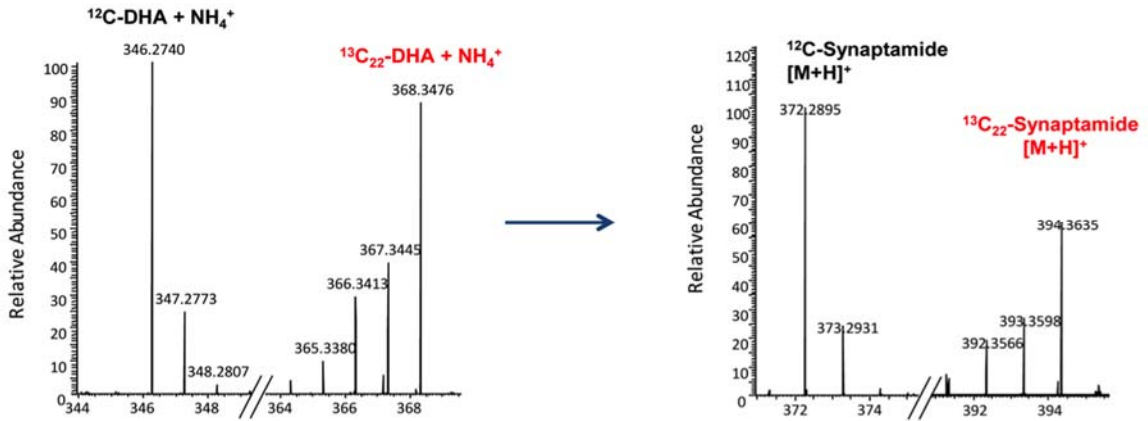

b.

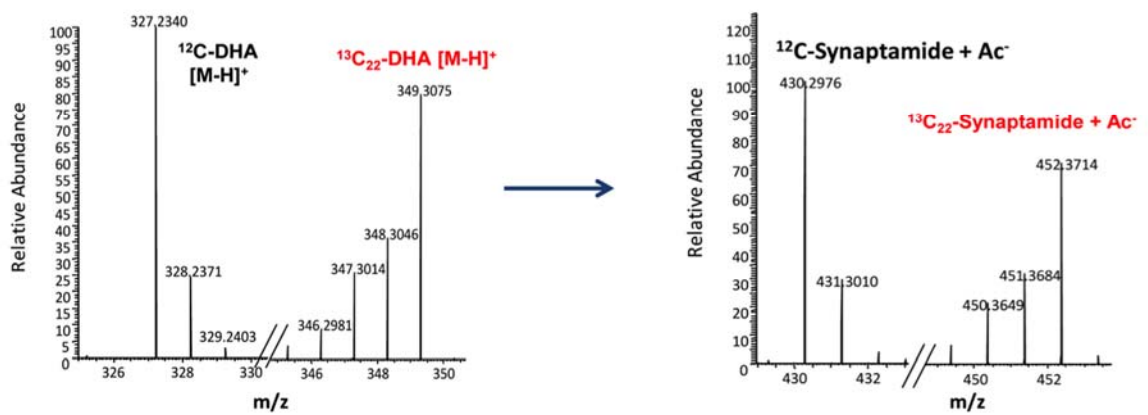

**Supplementary Fig. 1. Production of synaptamide from DHA in cortical neuron cultures.**

When DIV1 cortical neuron cultures were incubated with the mixture of  $^{12}\text{C}$ - and uniformly labeled  $^{13}\text{C}_{22}$ -DHA for 1 h, the production of  $^{12}\text{C}$ - and  $^{13}\text{C}_{22}$ -synaptamide was detected in the positive (a) and negative ion (b) ESI mass spectra. Data represent at least three independent experiments.

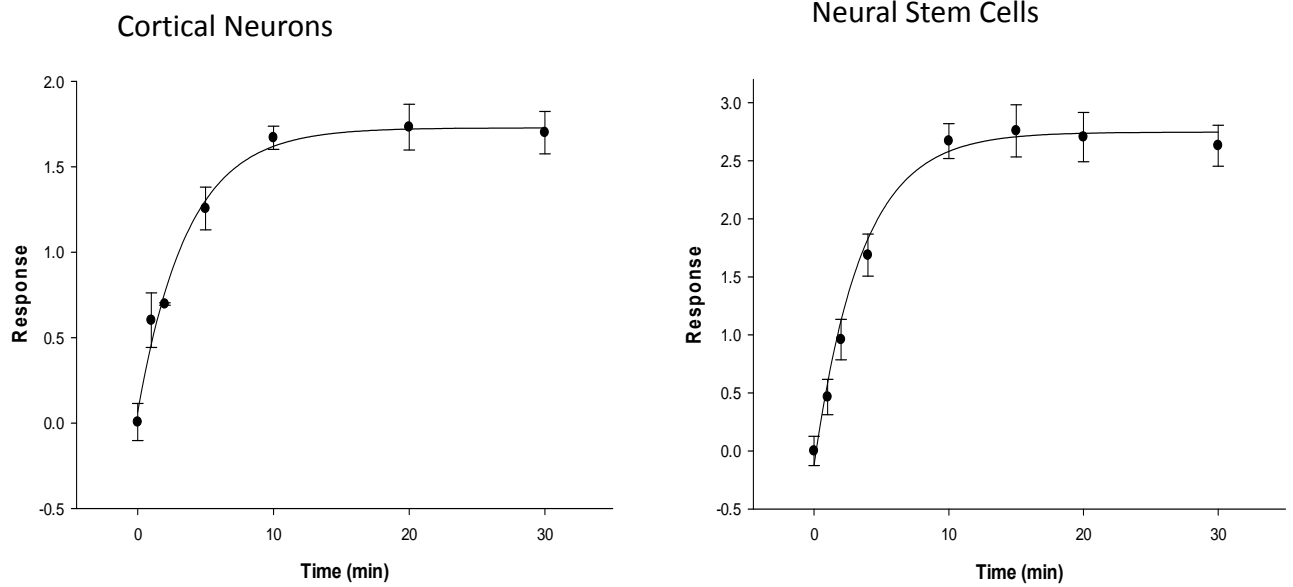

**Supplementary Fig. 2. Time course of cAMP production in response to synaptamide in cortical neurons and NSCs.** Synaptamide at 10 nM time-dependently increased cAMP production in cultured cortical neurons and NSCs. The cAMP production reached a plateau in 10-15 min. Each data point is presented as mean  $\pm$  s.e.m. of biological triplicates, representing two independent experiments.

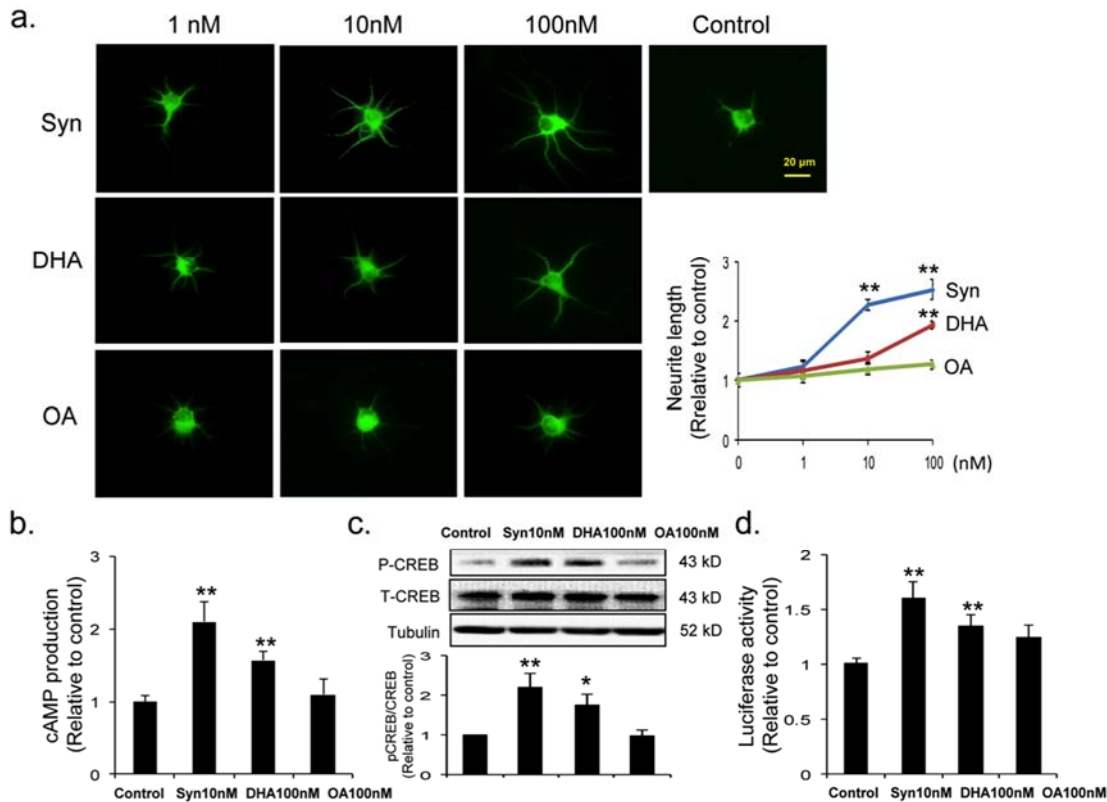

**Supplementary Fig. 3. Effects of synaptamide, DHA and OA on neurite growth, cAMP production and CREB activation in cortical neurons.** Synaptamide (Syn) dose-dependently increased neurite growth (a). DIV1 neurons were treated with synaptamide for 48 h. cAMP production (b) and CREB phosphorylation (c) were increased after treating DIV3 neurons with synaptamide for 10 min. Similarly, increased CRE transcriptional activity was also observed when DIV2 cortical neurons were transfected with the CRE reporter plasmid for 24 h and treated with synaptamide for additional 18 h (d). Data are presented as means  $\pm$  s.e.m. of biological triplicates, representing three independent experiments. \* $p$ <0.05, \*\* $p$ <0.01 in comparison with control (unpaired Student  $t$ -test). Scale bar: 20  $\mu\text{m}$ .

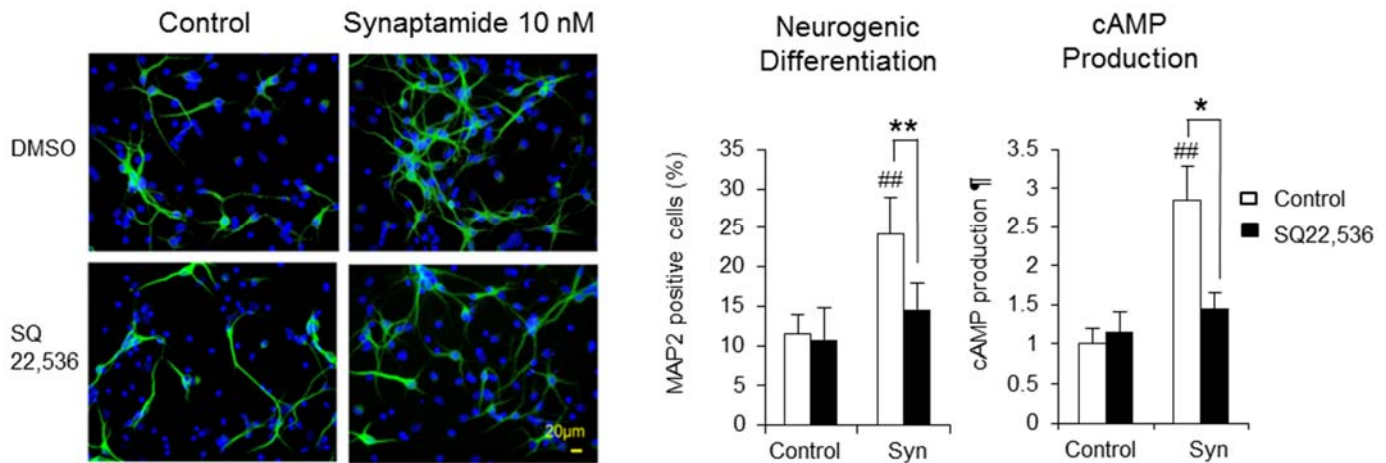

**Supplementary Fig. 4. cAMP-dependent neurogenesis induced by synaptamide.** Synaptamide-induced neurogenic differentiation and cAMP production in NSCs were abolished by SQ22,536. To evaluate neurogenic differentiation, NSCs were treated with 10 nM synaptamide from 6 h after seeding for 3 days, and DIV3 NSCs were stimulated with synaptamide for 10 min to measure cAMP production. Data are presented as means  $\pm$  s.e.m. of biological triplicates, representing three independent experiments.  $##p < 0.01$ ,  $*p < 0.05$ ,  $**p < 0.01$ , vs. corresponding control (unpaired Student t-test). ¶, relative to control.

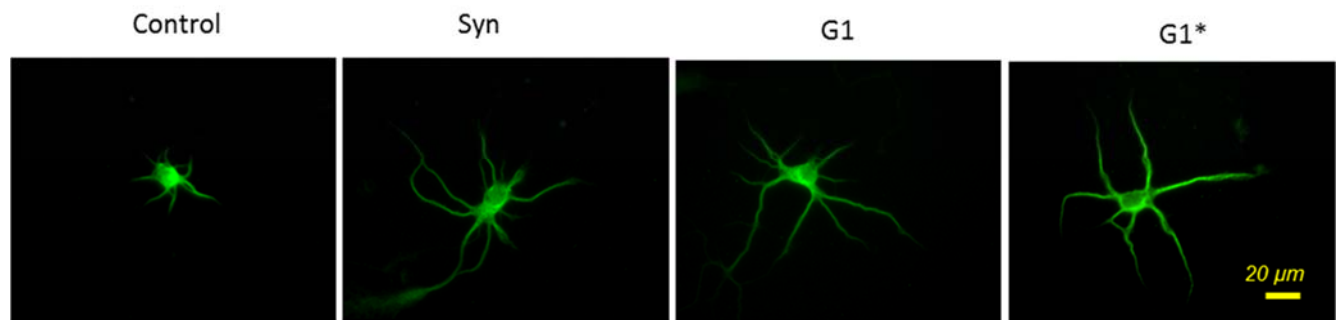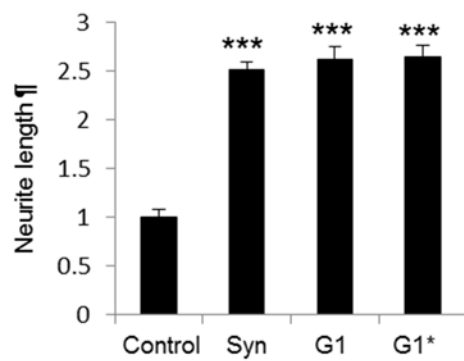

**Supplementary Fig. 5. Neurite growth promoted by synaptamide analogues.** Synaptamide, biotinylated synaptamide analogue (G1) and biotinylated synaptamide analogue (G1\*) containing a crosslinkable primary amine group G1\* at 10 nM increased cortical neurite outgrowth to an extent comparable to synaptamide treated on DIV1 for 48 h. Data are means  $\pm$  s.e.m. of biological triplicates, representing three independent experiments. \*\*\* $p < 0.001$  vs. control (unpaired Student *t*-test).

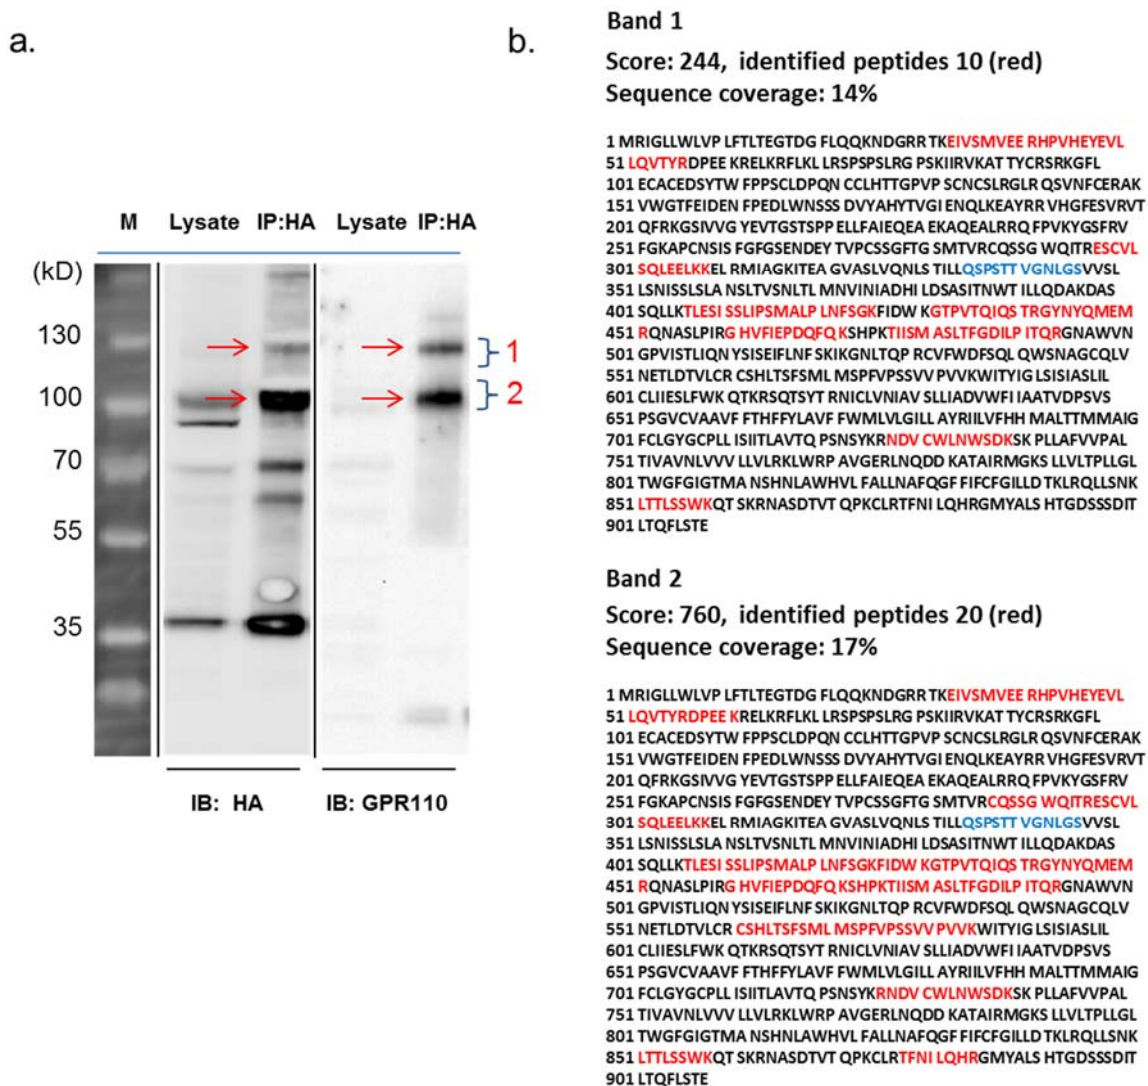

**Supplementary Fig. 6. Expression of full length mouse GPR110 (mGPR110) verified by Western blot analysis and mass spectrometry.** mGPR110-HA expressed in HEK293 cells and immunopurified (IP) using HA antibody was detected at ~130 (band 1) and ~100 kD (band 2) by both HA and *N*-terminal targeting GPR110 antibodies (a). Mass spectrometric analysis of these bands confirmed that both are full-length GPR110 based on the detected tryptic peptides highlighted in red (b). The peptide sequence highlighted in blue corresponds to the epitope sequence for the *N*-terminal targeting GPR110 antibody used in this study. This antibody did not

detect the C-terminal fragment at ~37 kD, the GPS autocleavage product of GPR110. M:  
Molecular weight marker. Data represent two independent experiments.

a.

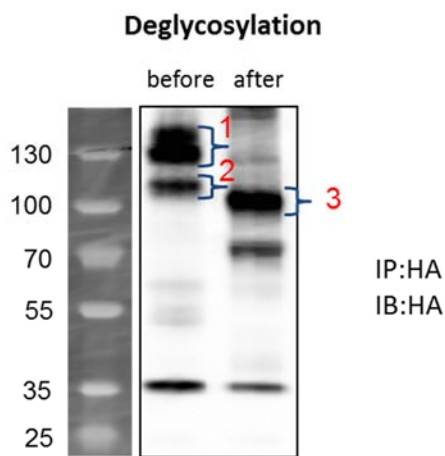

**Band 2 (~ 110 kD)**

**C.** Score 1153, identified peptides 19 (underlined)  
Sequence coverage: 27%

```

1 MKVGVWLWIS FFTFTDGHGG FLGKNDGIKT KKELIVNKKK HLGPVVEEYQL
51 LLQVTYRDSK EKRDLRNFLK LLKPPLLWSH GLIRIIRAKA TTDCNSLNGV
101 LQCTCEDSYT WFPPSCLDPQ NCVLHTAGAL PSCECHLNNL SQSVNFCERT
151 KIWGTFKINE RFTNDLLNSS SAIYSKYANG IEIQKKAYE RIQGFESVQV
201 TQFRNGSIVA GYEVVGSSSA SELLSAIEHV AEKAKTALHK LFPLEDGGSFR
251 VFGKAQCNDI VFGFGSKDDE YTLPCSSGYR GNITAKCESS GWQVIRETCV
301 LSLLEELNKN FSMIVGNATE AAVSSFVQNL SVIIRQNPST TVGNLASVVS
351 ILSNISSLSL ASHFRVSNST MEDVISIADN ILNSASVTNW TVLLREEKYA
401 SSRLELTEN ISTLVPPAL PLNFSRKFID WKGIPVNKSQLKRGYSYQIK
451 MCPQNTSIP I RGRVLIQSQQ FQRSLPETII SMASLTGNI LPVSKNGNAQ
501 VNGPVIStVI QNYSINEVFL FFSKIESNLS QPHCVFWDfS HLQWNDAGCH
551 LVNETQDIVT CQCTHLTSFS ILMSPFPST IPFVVKWITY VGLGISIGSL
601 ILCLIEALF WKQIKKSQTS HTRRICMVNI ALSLLIADVW FIVGATVDTT
651 VNPsgVCTAA VFFTHFFYLS LFFWMLMLGI LLAYRIILVF HHMAQHLMMMA
701 VGfCLGYGCP LIISVITIAV TQPSNTYKRK DVCWLNWSNG SKPLAFVVP
751 ALAIVAVNFV VLLVLTKLW RPTVGERLSR DDKATIIRVG KSLILTPLL
801 GLTWGFGIGT IVDSQNLAWH VIFALLNAFQ GFFILCFGIL LDSKLRLFF
851 NKLSALSSWK QTEKQNSDL SAKPKFSKPF NPLQNKGHYA FSHTGDSSDN
901 IMLTQFVSNE
  
```

b.

**Band 1 (~ 130 kD)**

Score: 2622, identified peptides 27 (underlined)  
Sequence coverage: 30%

```

1 N 1 MKVGVWLWIS FFTFTDGHGG FLGKNDGIKT KKELIVNKKK HLGPVVEEYQL
51 LLQVTYRDSK EKRDLRNFLK LLKPPLLWSH GLIRIIRAKA TTDCNSLNGV
101 LQCTCEDSYT WFPPSCLDPQ NCVLHTAGAL PSCECHLNNL SQSVNFCERT
151 KIWGTFKINE RFTNDLLNSS SAIYSKYANG IEIQKKAYE RIQGFESVQV
201 TQFRNGSIVA GYEVVGSSSA SELLSAIEHV AEKAKTALHK LFPLEDGGSFR
251 VFGKAQCNDI VFGFGSKDDE YTLPCSSGYR GNITAKCESS GWQVIRETCV
301 LSLLEELNKN FSMIVGNATE AAVSSFVQNL SVIIRQNPST TVGNLASVVS
351 ILSNISSLSL ASHFRVSNST MEDVISIADN ILNSASVTNW TVLLREEKYA
401 SSRLELTEN ISTLVPPAL PLNFSRKFID WKGIPVNKSQLKRGYSYQIK
451 MCPQNTSIP I RGRVLIQSQQ FQRSLPETII SMASLTGNI LPVSKNGNAQ
501 VNGPVIStVI QNYSINEVFL FFSKIESNLS QPHCVFWDfS HLQWNDAGCH
580 T 551 LVNETQDIVT CQCTHLTSFS ILMSPFPST IPFVVKWITY VGLGISIGSL
601 ILCLIEALF WKQIKKSQTS HTRRICMVNI ALSLLIADVW FIVGATVDTT
651 VNPsgVCTAA VFFTHFFYLS LFFWMLMLGI LLAYRIILVF HHMAQHLMMMA
701 VGfCLGYGCP LIISVITIAV TQPSNTYKRK DVCWLNWSNG SKPLAFVVP
751 ALAIVAVNFV VLLVLTKLW RPTVGERLSR DDKATIIRVG KSLILTPLL
850 M 801 GLTWGFGIGT IVDSQNLAWH VIFALLNAFQ GFFILCFGIL LDSKLRLFF
851 NKLSALSSWK QTEKQNSDL SAKPKFSKPF NPLQNKGHYA FSHTGDSSDN
910 C 901 IMLTQFVSNE
  
```

d.

**Band 3 (~ 100 kD)**

Score: 4739, identified peptides 32 (underlined)  
Sequence coverage: 38%

```

1 N 1 MKVGVWLWIS FFTFTDGHGG FLGKNDGIKT KKELIVNKKK HLGPVVEEYQL
51 LLQVTYRDSK EKRDLRNFLK LLKPPLLWSH GLIRIIRAKA TTDCNSLNGV
101 LQCTCEDSYT WFPPSCLDPQ NCVLHTAGAL PSCECHLNNL SQSVNFCERT
151 KIWGTFKINE RFTNDLLNSS SAIYSKYANG IEIQKKAYE RIQGFESVQV
201 TQFRNGSIVA GYEVVGSSSA SELLSAIEHV AEKAKTALHK LFPLEDGGSFR
251 VFGKAQCNDI VFGFGSKDDE YTLPCSSGYR GNITAKCESS GWQVIRETCV
301 LSLLEELNKN FSMIVGNATE AAVSSFVQNL SVIIRQNPST TVGNLASVVS
351 ILSNISSLSL ASHFRVSNST MEDVISIADN ILNSASVTNW TVLLREEKYA
401 SSRLELTEN ISTLVPPAL PLNFSRKFID WKGIPVNKSQLKRGYSYQIK
451 MCPQNTSIP I RGRVLIQSQQ FQRSLPETII SMASLTGNI LPVSKNGNAQ
501 VNGPVIStVI QNYSINEVFL FFSKIESNLS QPHCVFWDfS HLQWNDAGCH
580 T 551 LVNETQDIVT CQCTHLTSFS ILMSPFPST IPFVVKWITY VGLGISIGSL
601 ILCLIEALF WKQIKKSQTS HTRRICMVNI ALSLLIADVW FIVGATVDTT
651 VNPsgVCTAA VFFTHFFYLS LFFWMLMLGI LLAYRIILVF HHMAQHLMMMA
701 VGfCLGYGCP LIISVITIAV TQPSNTYKRK DVCWLNWSNG SKPLAFVVP
751 ALAIVAVNFV VLLVLTKLW RPTVGERLSR DDKATIIRVG KSLILTPLL
850 M 801 GLTWGFGIGT IVDSQNLAWH VIFALLNAFQ GFFILCFGIL LDSKLRLFF
851 NKLSALSSWK QTEKQNSDL SAKPKFSKPF NPLQNKGHYA FSHTGDSSDN
910 C 901 IMLTQFVSNE
  
```

e.

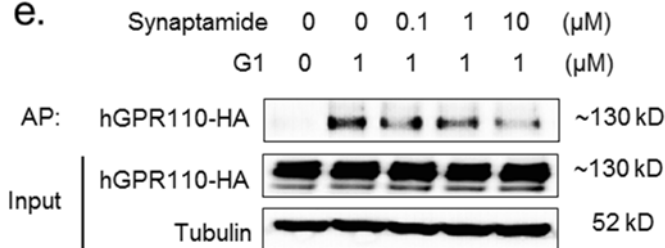

**Supplementary Fig. 7. Expression of full length human GPR110 verified by Western blot**

**analysis and mass spectrometry. a,** Western blot analysis of hGPR110-HA. HA-tagged GPR110



was overexpressed in HEK293 cells and immunoprecipitated with anti-HA antibody. The immunopurified human GPR110-HA (hGPR110-HA) was detected at ~130 kD (band 1) and ~110 kD (band 2). After deglycosylation using PNGase F, a major band at ~100 kD (band 3) was observed. b-d, Mass spectrometric detection of full-length hGPR110 (gi/61743940). *N*- and *C*-terminal peptides as well as transmembrane (TM) peptides were identified by MS in all of the three bands indicated. The *N*-linked deglycosylation by PNGase F accompanies deamidation of the asparagine residue to aspartic acid, although non-enzymatic deamination can also occur. Five additional *N*-terminal peptides (highlighted in blue), along with deamidation of N368, N389, N410, N423, and N512 were identified from the deglycosylated sample (d), in comparison to the case without treating with the deglycosylation enzyme (b and c). The data suggests that these asparagine residues are most likely the *N*-linked glycosylation sites of hGPR110. The peptides identified by MS are underlined, and the predicted *N*-linked glycosylation sites (N-!P-S/T) are highlighted in red in the primary structure of hGPR110. As observed with mGPR110, the G1 binding to hGPR110 was displaced by synaptamide (e), indicating that synaptamide binds to hGPR110. Data represent two independent experiments.

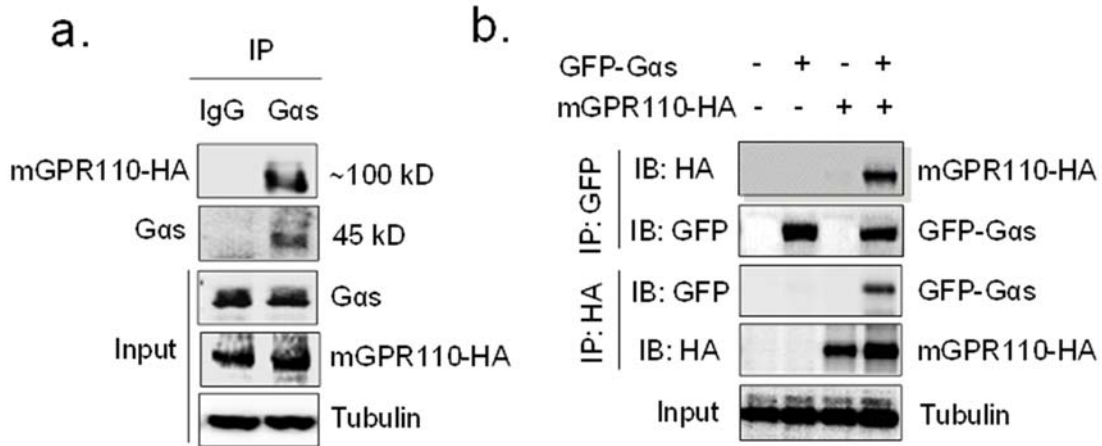

**Supplementary Fig. 8. Verification of GPR110 interaction with Gas by co-immunoprecipitation.** GPR110 interaction with Gas was verified by co-immunoprecipitation of overexpressed mGPR110-HA with endogenous Gas using Gas antibody (a). GPR110-HA and GFP-Gas co-overexpressed in HEK cells were also co-immunoprecipitated using HA or GFP antibody, further confirming the association of GPR110 and Gas (b). Data represent two independent experiments.

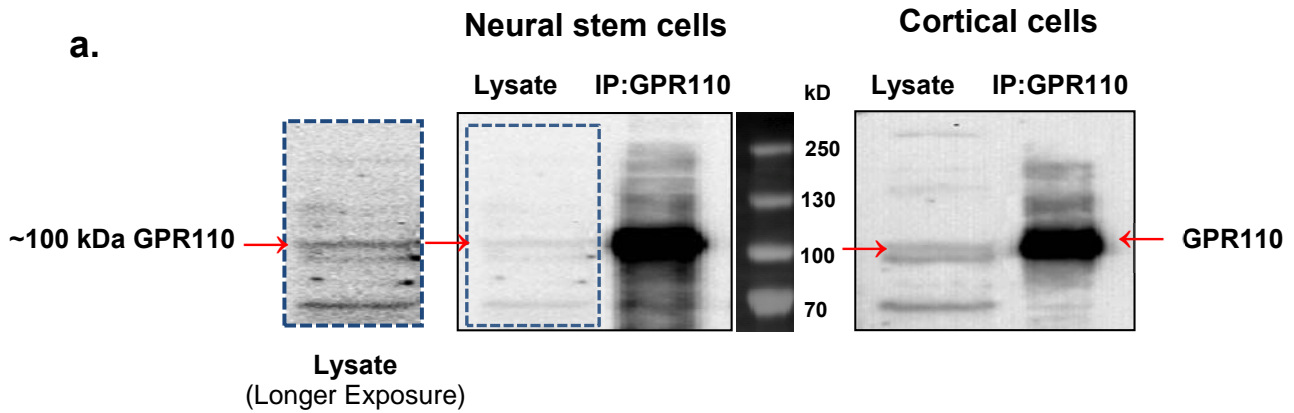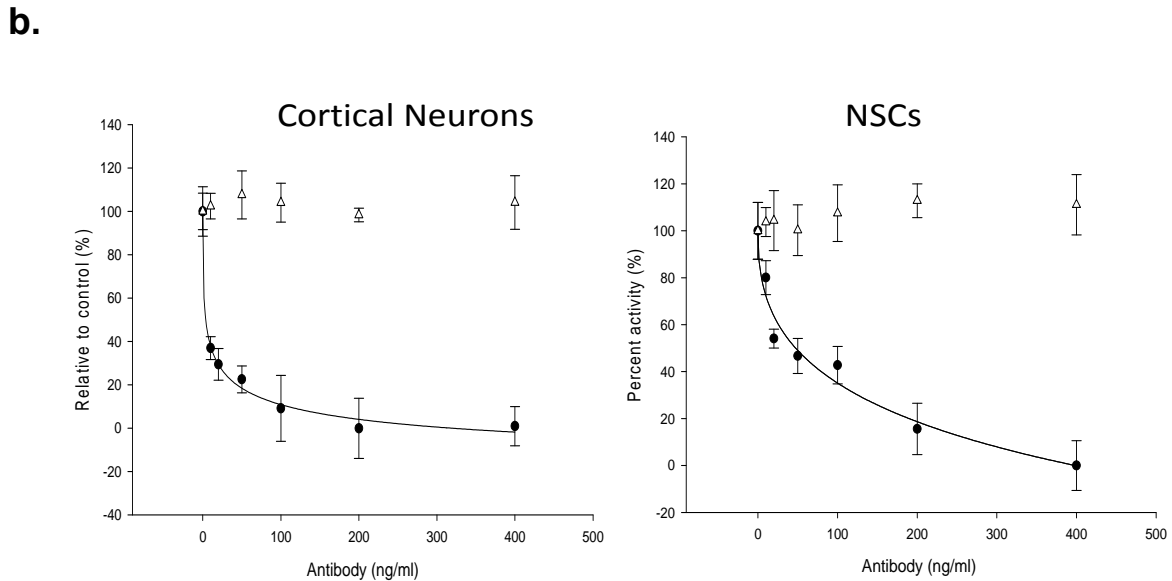

**Supplementary Fig. 9. N-terminal targeting GPR110 antibody detecting endogenous GPR110 and blocking synaptamide-induced cAMP production in cortical neurons and neural stem cells (NSCs).** The N-terminal targeting GPR110 antibody detects the expression of GPR110 from the lysate of NSCs and cortical neurons at ~100 kD. Data represent three independent experiments. Enrichment of GPR110 was indicated after immunopurification with the same GPR110 antibody (a). The GPR110 antibody (closed circle) dose-dependently blocked the cAMP production induced by 10 nM synaptamide while control IgG (open triangle) did not affect

synaptamide-induced cAMP production (b). Each data point in b is presented as mean  $\pm$  s.e.m. of biological triplicates, representing two independent experiments.

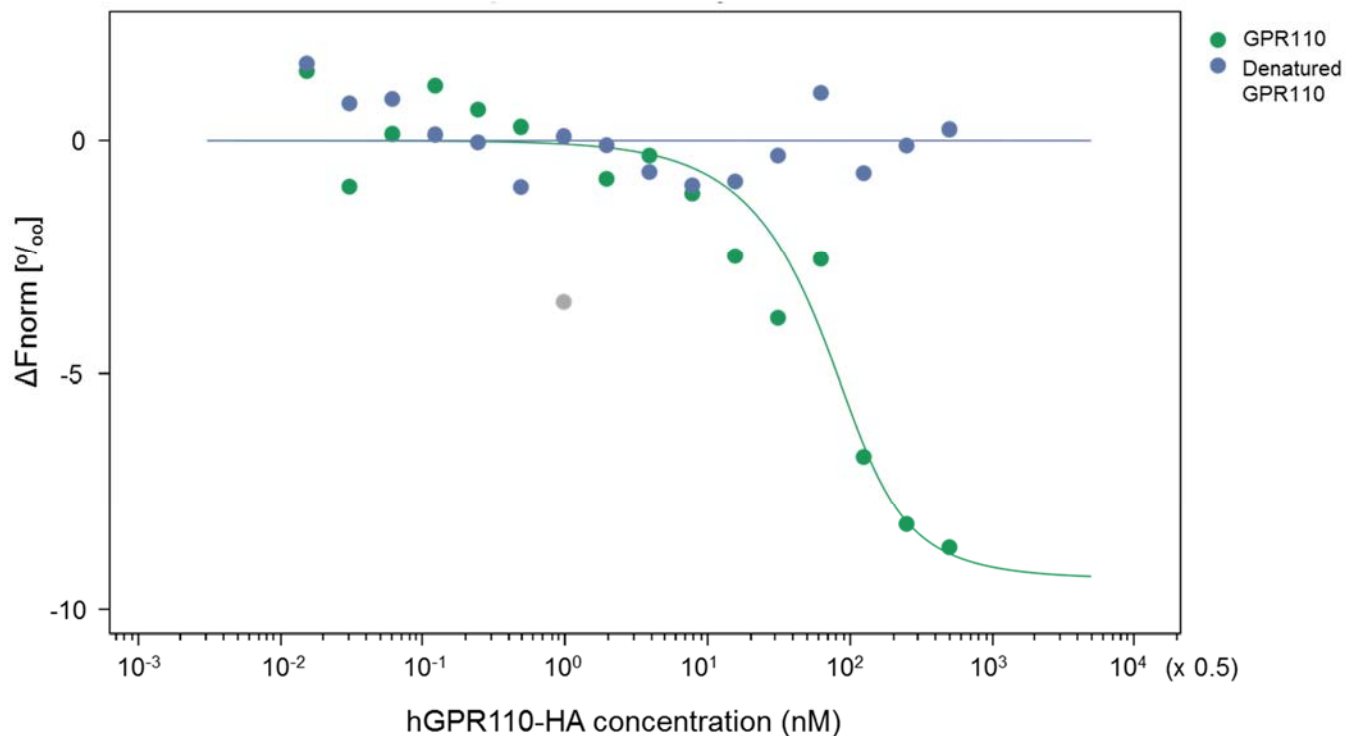

**Supplementary Fig. 10. Binding of bodipy-synaptamide to hGPR110-HA.** The direct interaction between bodipy-synaptamide, a fluorescent group-labeled synaptamide, and hGPR110-HA immunopurified in PBS containing 0.5% Triton X-100 from HEK cells was assessed by microscale thermophoresis. Under this condition, the apparent  $K_d$  was found to be  $\sim 20$  nM, most likely right-shifted as the bodipy-synaptamide concentration (20 nM) used in this assay was above the low nM  $K_d$  expected from the cAMP production ( $EC_{50} = 2-5$  nM). Nevertheless, the data confirmed the binding between GPR110 and bodipy-synaptamide. No binding was observed when hGPR110-HA was thermally denatured by heating at 60 °C for 30 min. Data represent two independent experiments.

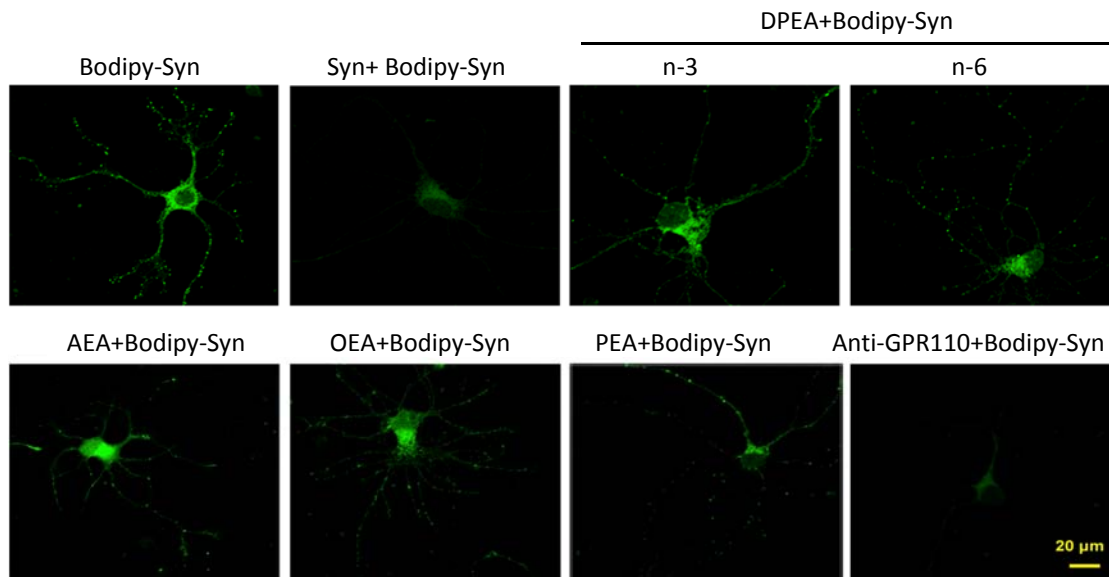

**Supplementary Fig. 11. Synaptamide is a specific ligand to GPR110.** Only synaptamide (1  $\mu\text{M}$ ) and *N*-terminal targeting GPR110 antibody (0.4  $\mu\text{g}/\text{mL}$ ) among various fatty acyl ethanolamides (1  $\mu\text{M}$ , pretreatment for 30 min) abolished the fluorescent endocytic receptor puncta formed after bodipy-synaptamide (100 nM) treatment for 30 min. Syn, synaptamide; n3, omega-3; n6, omega-6; DPEA, *N*-docosapentaenoyl ethanolamine; OEA, *N*-oleoyl ethanolamine; AEA, *N*-arachidonyl ethanolamine; PEA, *N*-palmitoyl ethanolamine. Representative data from five independent experiments are presented.

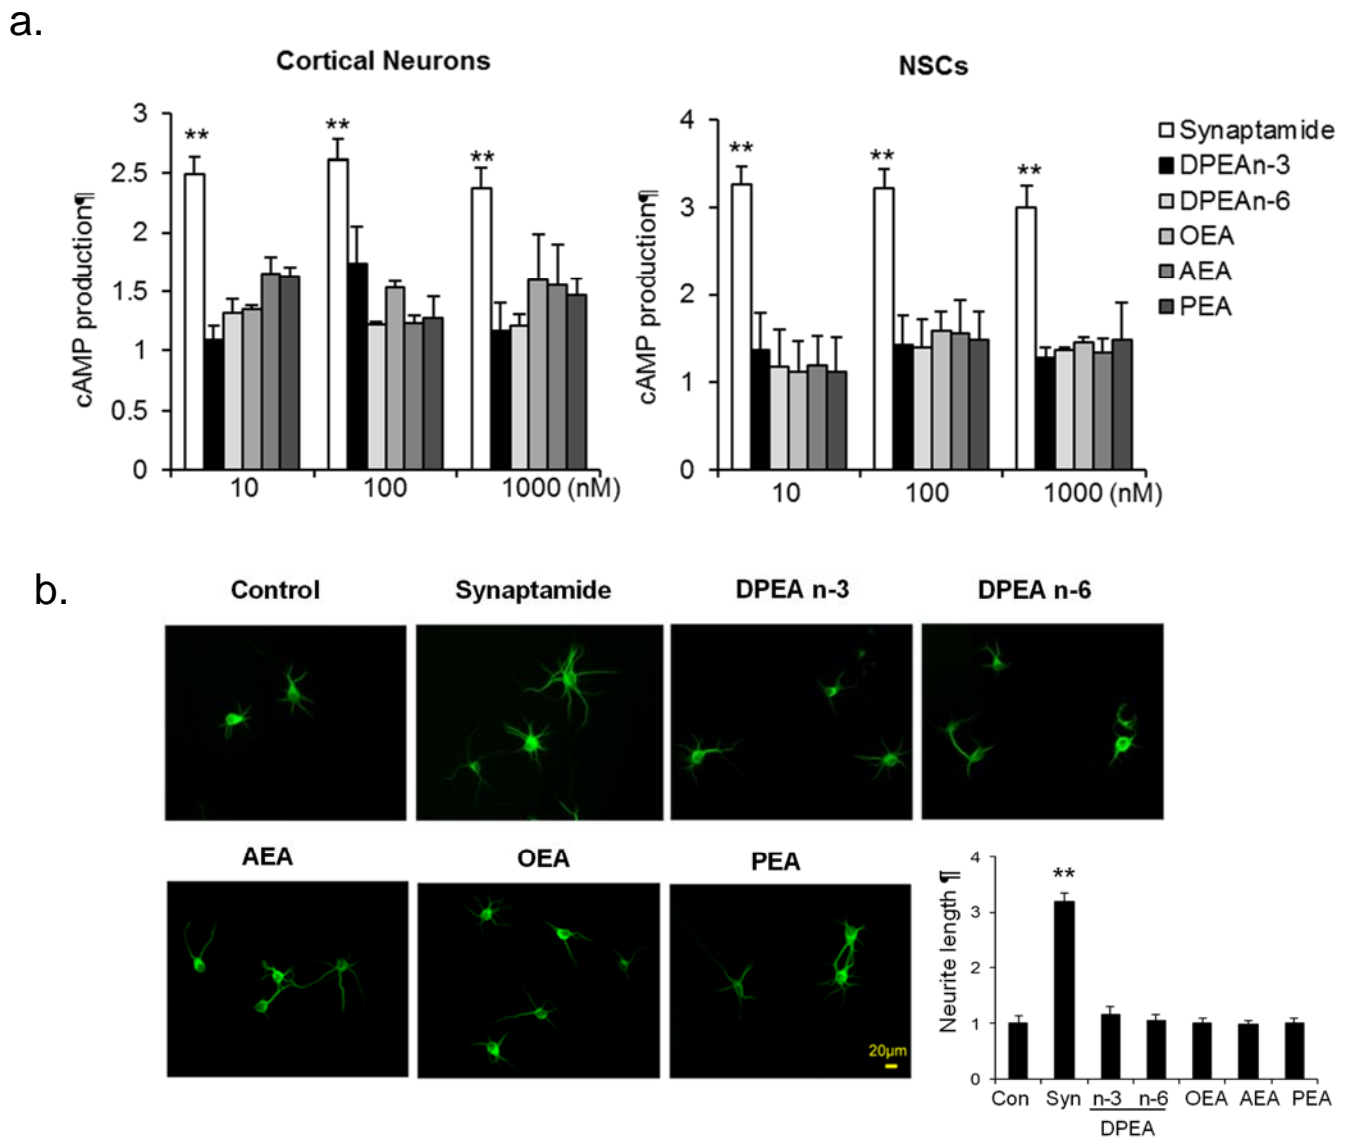

**Supplementary Fig. 12. Induction of cAMP production and neurite growth specifically by synaptamide.** **a.** Only synaptamide among various fatty acyl ethanolamides significantly increased cAMP at concentrations up to 1  $\mu$ M. For cAMP production, DIV3 cortical neurons or NSCs were stimulated with fatty acyl ethanolamides for 10 min. **b.** Representative photomicrographs of MAP-2 positive neurons were obtained after treating DIV1 cortical cultures with 10 nM *N*-acylethanolamines for 48 h, showing induction of neurite outgrowth only by synaptamide. Data are

presented as means  $\pm$  s.e.m. of biological triplicates, representing three independent experiments. \*\* $p < 0.01$  vs. control (unpaired Student  $t$ -test). ¶, relative to control.

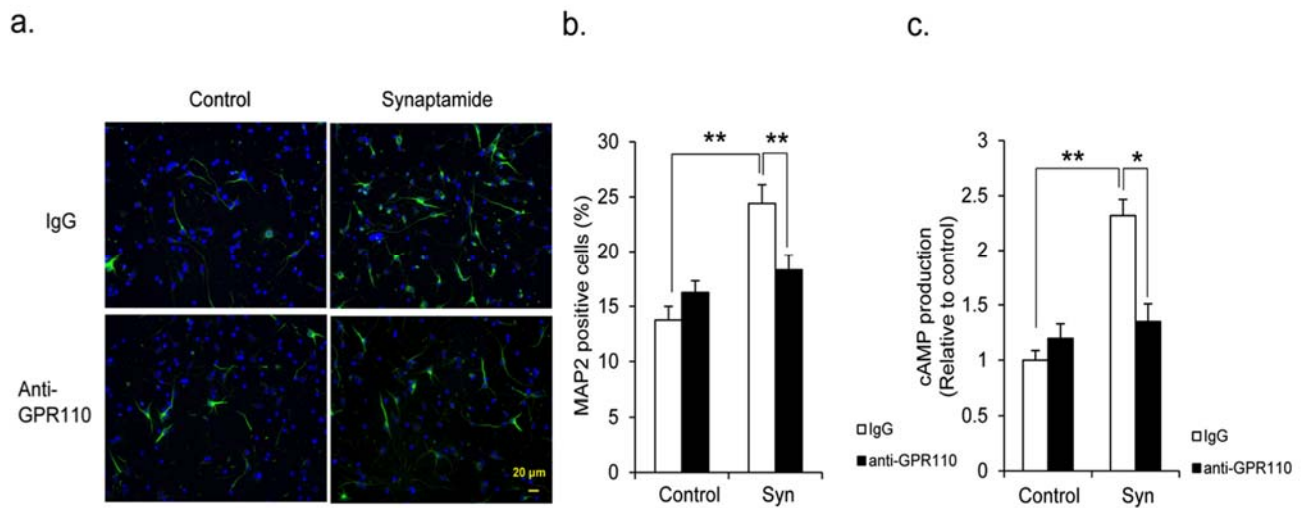

**Supplementary Fig. 13. Synaptamide-induced cAMP production and neurogenic differentiation blocked by pretreatment with anti-GPR110 antibody.** Mouse NSC cells were pretreated with 0.4  $\mu$ g/mL *N*-terminal targeting GPR110 antibody for 30 min under a non-permeable condition at 6 h after seeding and subsequently treated with 10 nM synaptamide for 3 days for the evaluation of neurogenic differentiation. Similarly, cAMP production was evaluated after stimulating DIV3 NSCs with synaptamide for 10 min after pretreatment with GPR110 antibody for 30 min. Synaptamide-induced neurogenic differentiation (a, b) and cAMP production (c) were completely blocked by the treatment with GPR110 antibody. Data are presented as means  $\pm$  s.e.m. of biological triplicates, representing three independent experiments. \* $p < 0.05$ , \*\* $p < 0.01$  vs. control (unpaired Student  $t$ -test). Scale bar: 20  $\mu$ m.

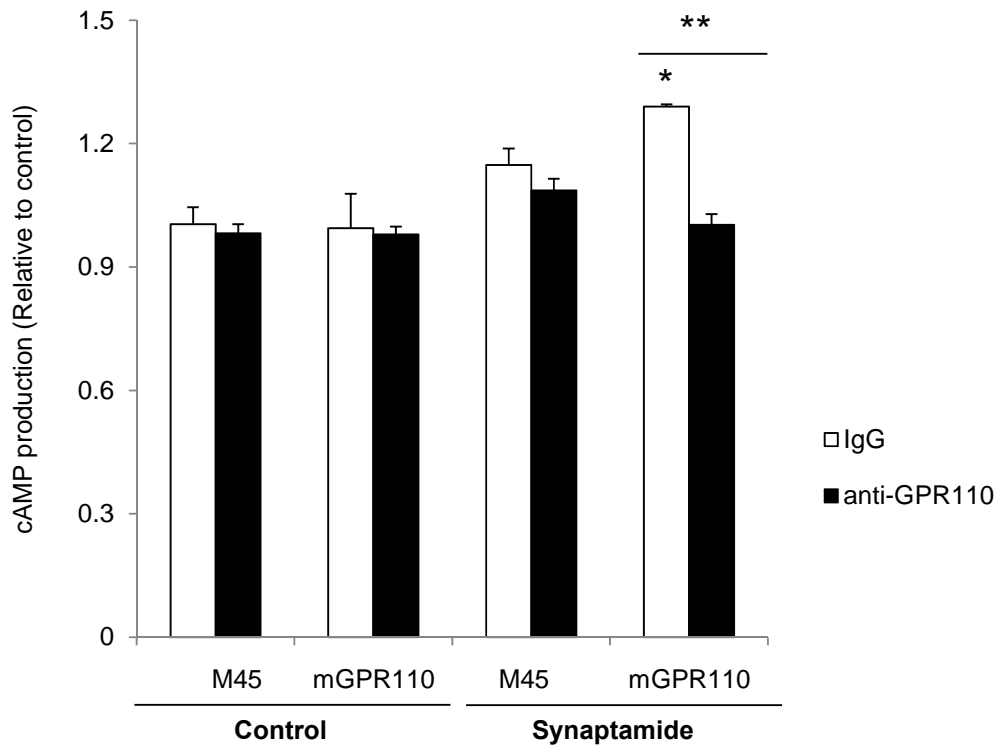

**Supplementary Fig. 14. Prevention of synaptamide-induced cAMP production by GPR110 antibody.** A549 cells were transfected with empty vector (M45) or HA-tagged mouse GPR110 (mGPR110-HA). After 24 h, cells were treated with 0.4  $\mu\text{g}/\text{mL}$  *N*-terminal targeting GPR110 antibody or control IgG for 30 min followed by 10 nM synaptamide for 10 min. Although the increase in cAMP in mGPR110-transfected A549 cells is relatively small in response to 10 nM synaptamide, the increase is still abrogated by anti-GPR110. Data are presented as means  $\pm$  s.e.m. of biological triplicates, representing three independent experiments. \* $p < 0.05$ , \*\* $p < 0.01$  vs. control (unpaired Student *t*-test).



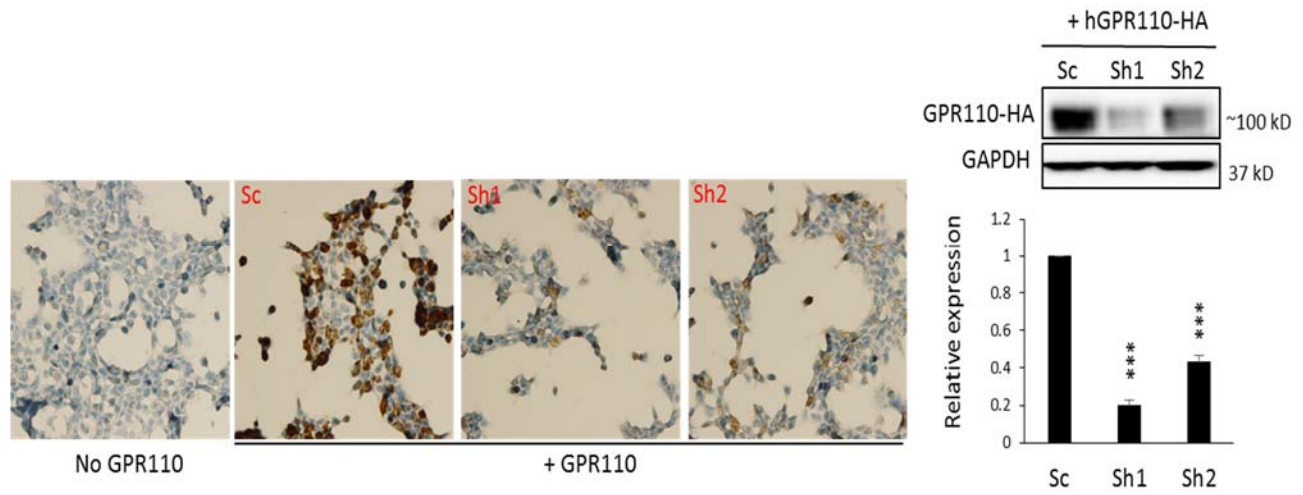

**Supplementary Fig. 15. *In situ* hybridization detecting *gpr110* overexpression and silencing.**

HEK293 cells were co-transfected with mGPR110-HA and GPR110 shRNAs (sh1 and sh2) or scrambled RNA (Sc). Cells were hybridized with the *gpr110* RNAscope probe. The overexpressed *gpr110* signal detected by *in situ* hybridization is shown in brown. GPR110 shRNA expression prevented *gpr110* expression while scrambled control RNA (Sc) showed no effects. Quantitative data are presented as means  $\pm$  s.e.m. for biological triplicate, representing three independent experiments. \*\*\* $p < 0.001$  vs. control (unpaired Student *t*-test).

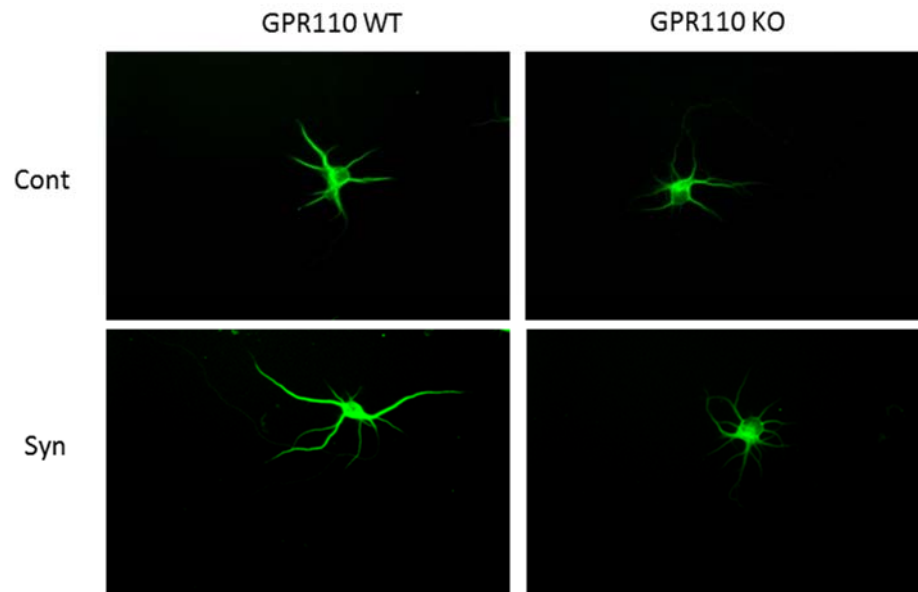

**Supplementary Fig. 16. Representative micrographs showing no synaptamide effect on neurite outgrowth in cortical neurons from GPR110 KO mice.** The DIV1 cortical neurons obtained from GPR110 WT and KO P0 animals were treated with 10 nM synaptamide for 48 h. Synaptamide (Syn) increased neurite growth in WT but not in KO neurons. Representative micrographs are presented from three independent experiments.

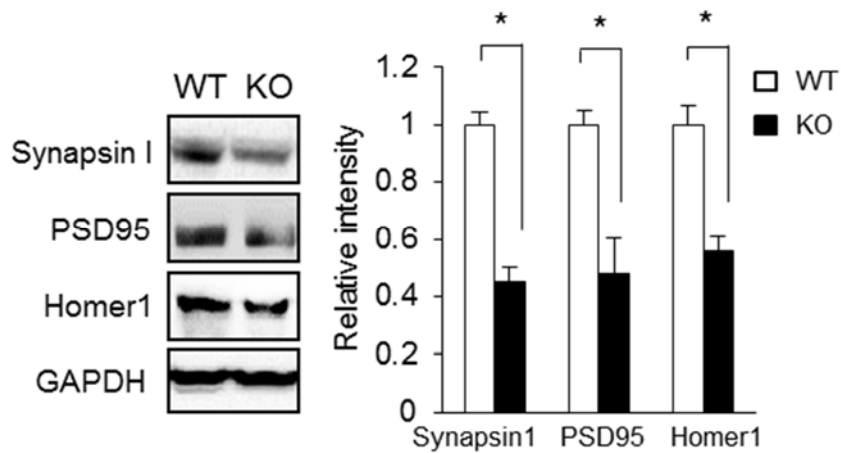

**Supplementary Fig. 17. Western blot analysis showing significant decreases in synapsin1, PSD95 and Homer1 proteins in the KO brain.** The cortical expression of synapsin1, PSD95 and homer1 in P10 KO brains was significantly lower compared to WT. Data are presented as means  $\pm$  s.e.m. of biological triplicates, representing two independent experiments. \* $p < 0.05$  vs. control (unpaired Student *t*-test).

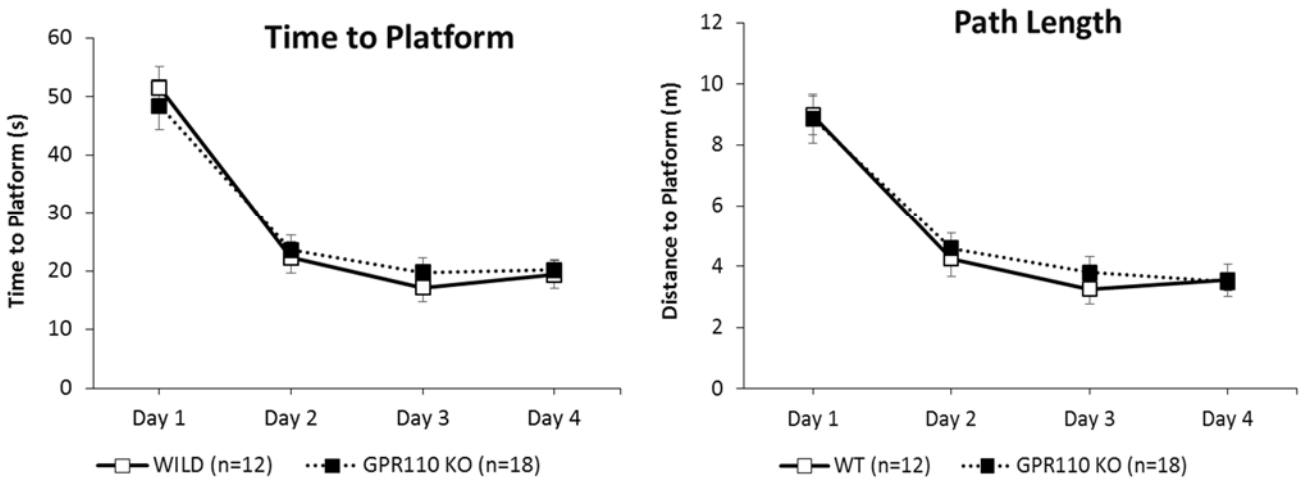

**Supplementary Fig. 18. Acquisition trials for Morris water maze.** The performance of WT and GPR110 KO mice improved at a similar rate during the training sessions across 4 days. Both the escape time and the distance to platform is comparable between the two groups ( $p > 0.05$ , Two way repeated measures ANOVA). Data are expressed as means  $\pm$  s.e.m. with the animal numbers as indicated in the figure legend.

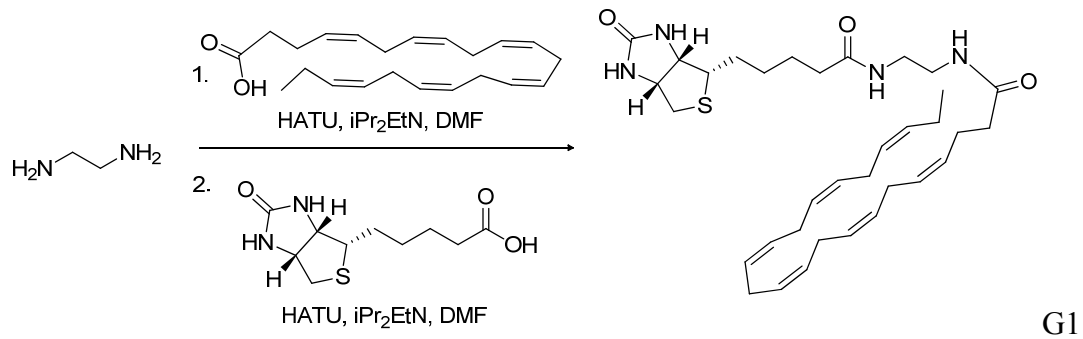

**Supplementary Fig. 19. Chemical synthesis of (4*Z*,7*Z*,10*Z*,13*Z*,16*Z*,19*Z*)-*N*-(2-(5-((3*aS*,4*S*,6*aR*)-2-oxohexahydro-1*H*-thieno[3,4-*d*]imidazol-4-yl)pentanamido)ethyl)docosa-4,7,10,13,16,19-hexaenamide (G1).**

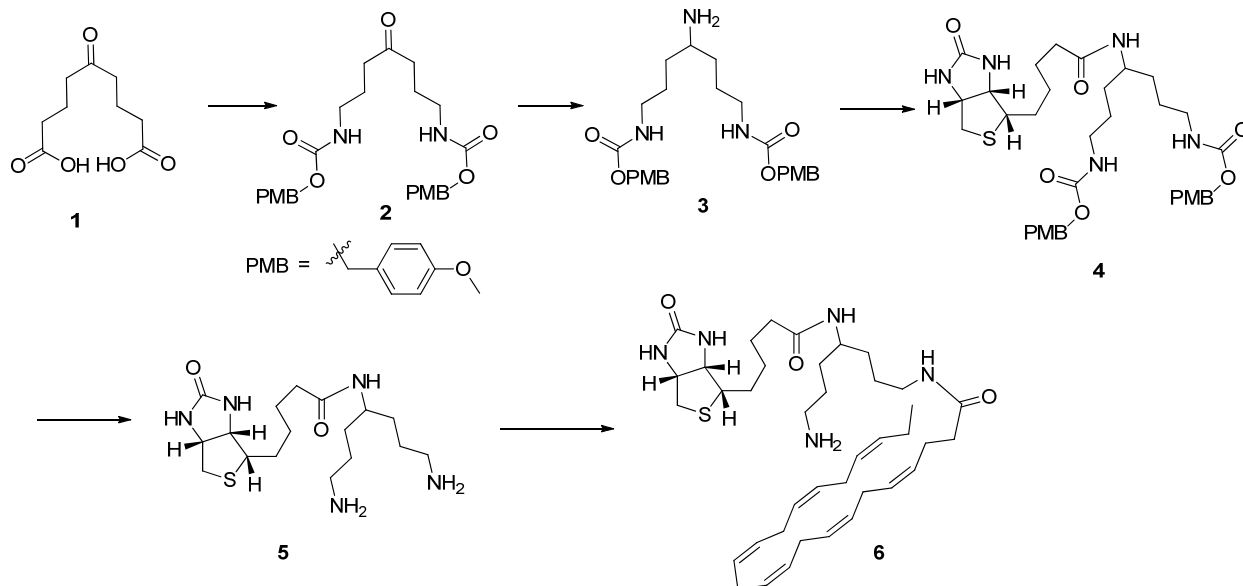

**Supplementary Fig. 20. Preparation of (4Z,7Z,10Z,13Z,16Z,19Z)-N-(7-amino-4-(5-((3a*S*,4*S*,6a*R*)-2-oxohexahydro-1*H*-thieno[3,4-*d*]imidazol-4-yl)pentanamido)heptyl)docosa-4,7,10,13,16,19-hexaenamide (G1\*).**

- (1) 5-Oxononanedioic acid
- (2) 4-Methoxybenzyl 4-oxoheptane-1,7-diyl dicarbamate
- (3) Bis(4-methoxybenzyl) (4-aminoheptane-1,7-diyl) dicarbamate
- (4) Bis(4-methoxybenzyl) (4-(5-((3a*S*,4*S*,6a*R*)-2-oxohexahydro-1*H*-thieno[3,4-*d*]imidazol-4-yl)pentanamido) heptane-1,7-diyl) dicarbamate
- (5) *N*-(1,7-diaminoheptan-4-yl)-5-((3a*S*,4*S*,6a*R*)-2-oxohexahydro-1*H*-thieno[3,4-*d*]imidazol-4-yl)pentanamide
- (6) (4*Z*,7*Z*,10*Z*,13*Z*,16*Z*,19*Z*)-*N*-(7-amino-4-(5-((3a*S*,4*S*,6a*R*)-2-oxohexahydro-1*H*-thieno[3,4-*d*]imidazol-4-yl)pentanamido)heptyl)docosa-4,7,10,13,16,19-hexaenamide (6, G1\*).

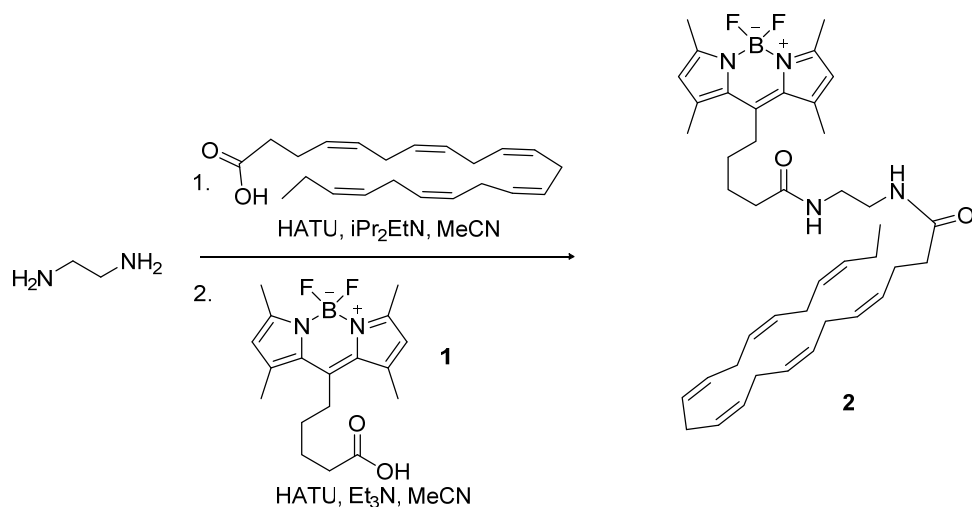

**Supplementary Fig. 21. Preparation of 10-((2-(((4Z,7Z,10Z,13Z,16Z,19Z)-docosa-4,7,10,13,16,19-hexaenamido)ethyl)amino)-5-oxopentyl)-5,5-difluoro-1,3,7,9-tetramethyl-5H-dipyrrolo[1,2-c:2',1'-f][1,3,2]diazaborinin-4-ium-5-uide (Bodipy-synaptamide).**

1. 5-(5,5-difluoro-1,3,7,9-tetramethyl-5H-41<sup>4</sup>,51<sup>4</sup>-dipyrrolo[1,2-c:2',1'-f][1,3,2]diazaborinin-10-yl)pentanoic acid
2. Bodipy-synaptamide

Supplementary Fig. 22. Uncropped western blots

Fig. 2e.

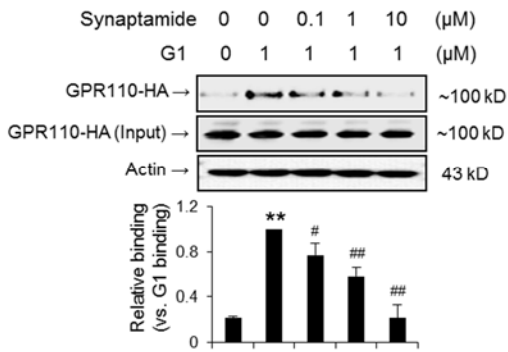

Fig. 2f.

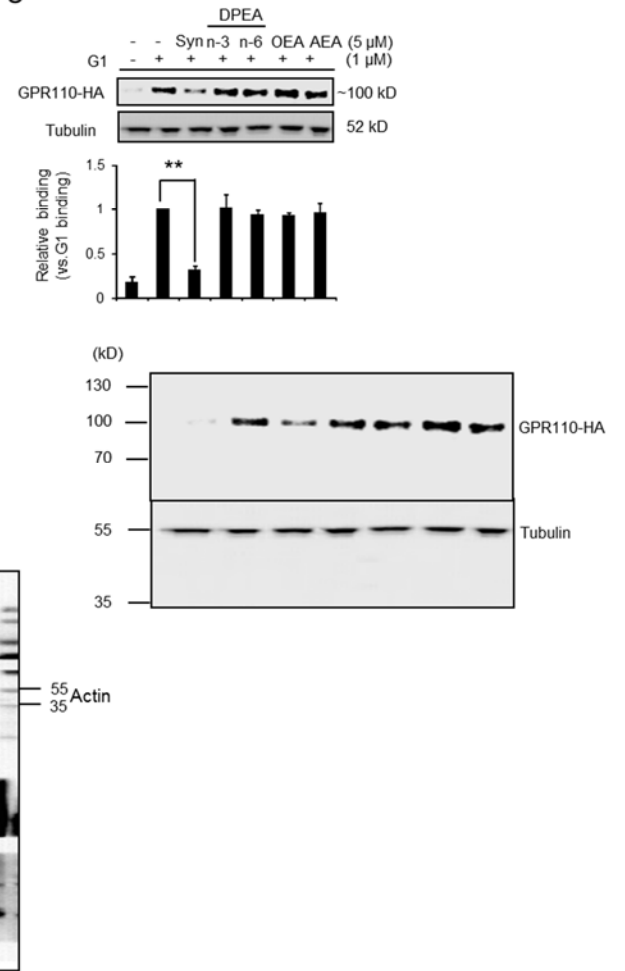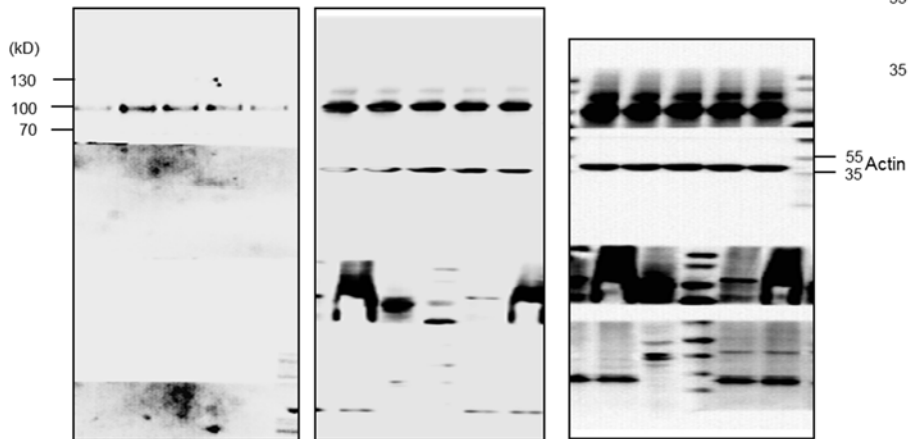



**Fig 2h.**

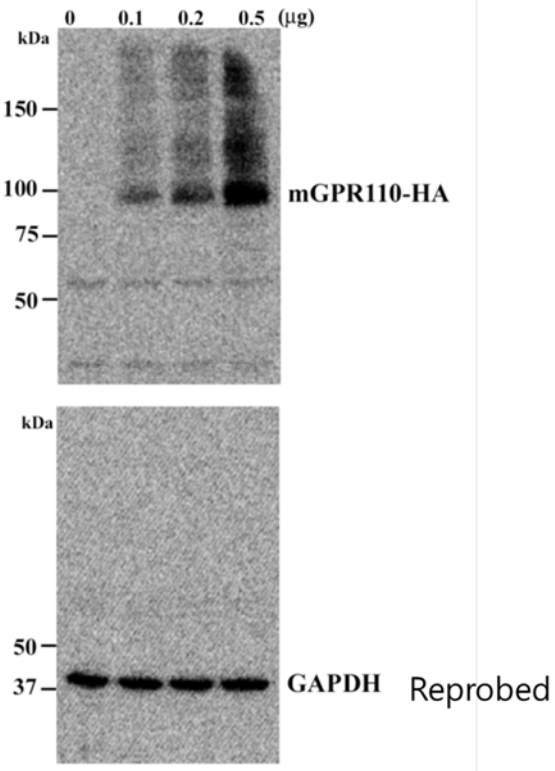

Fig. 2i.

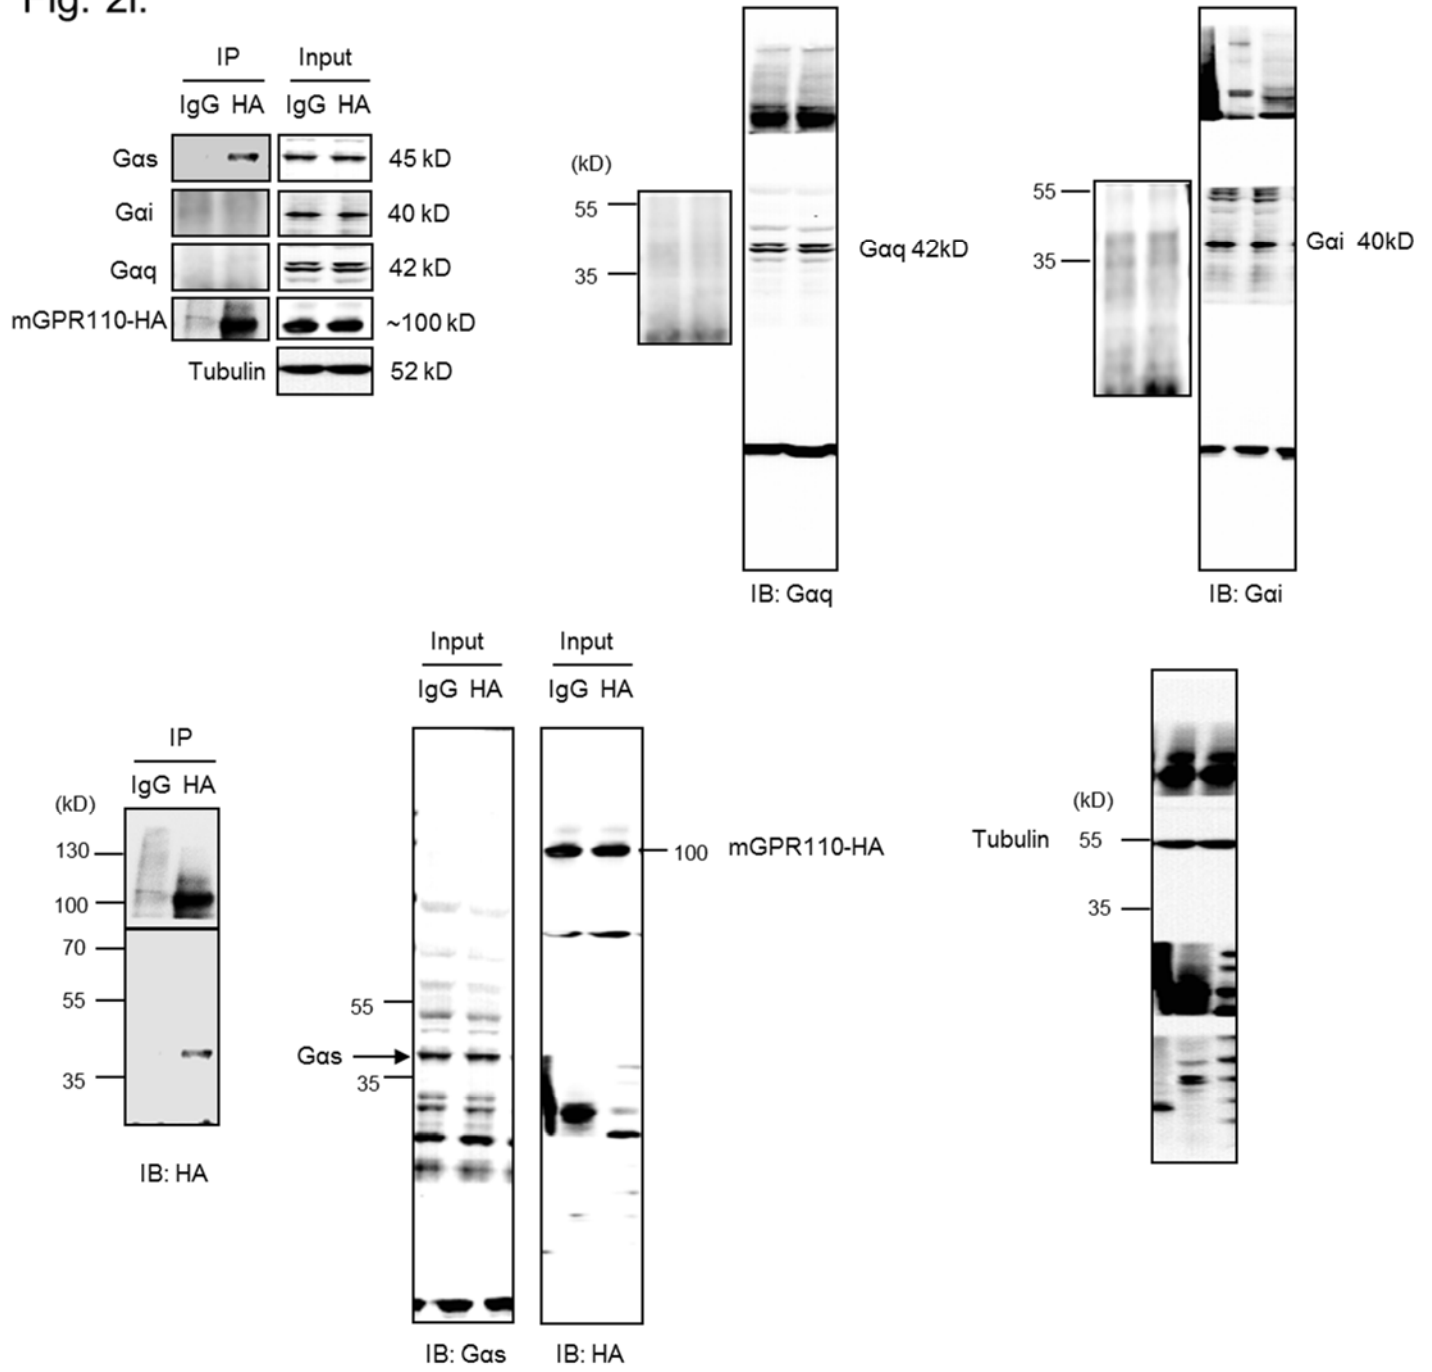

Fig. 3d.

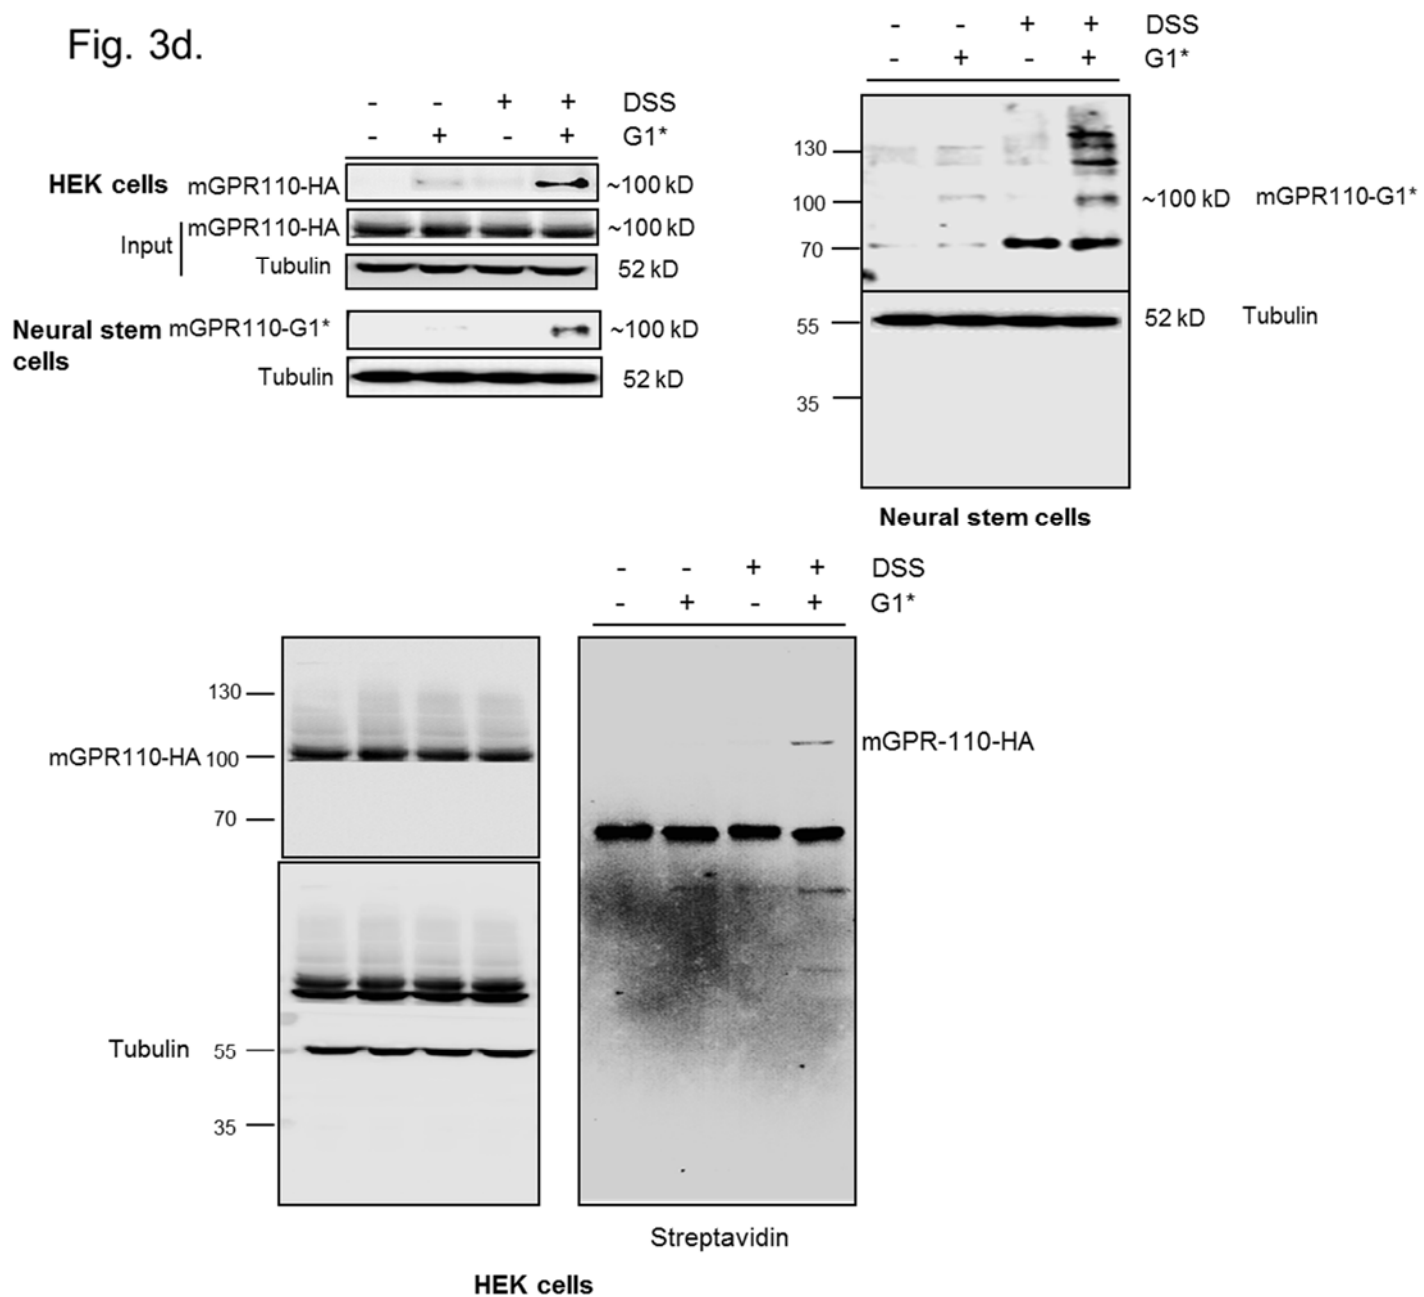

Fig. 4b.

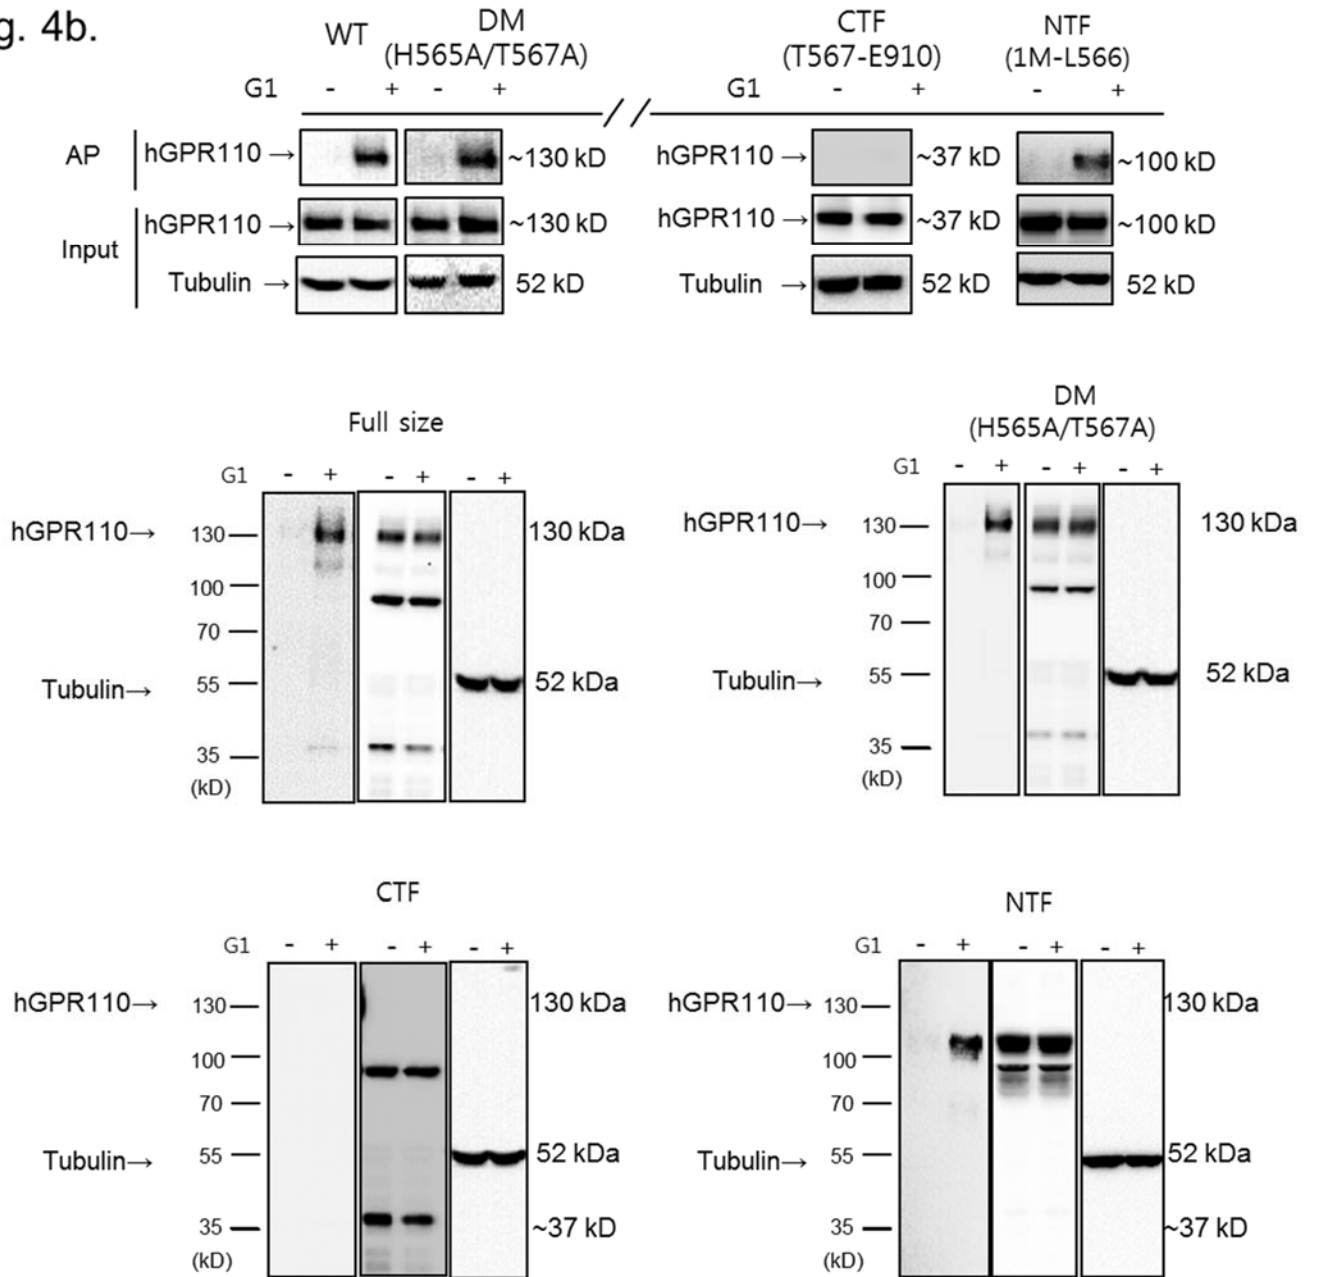

Fig.7a.

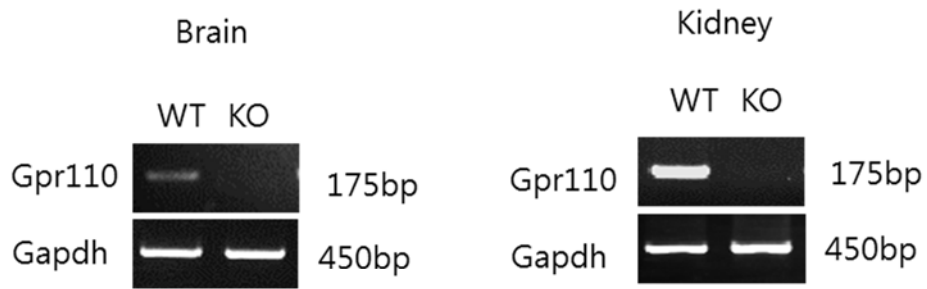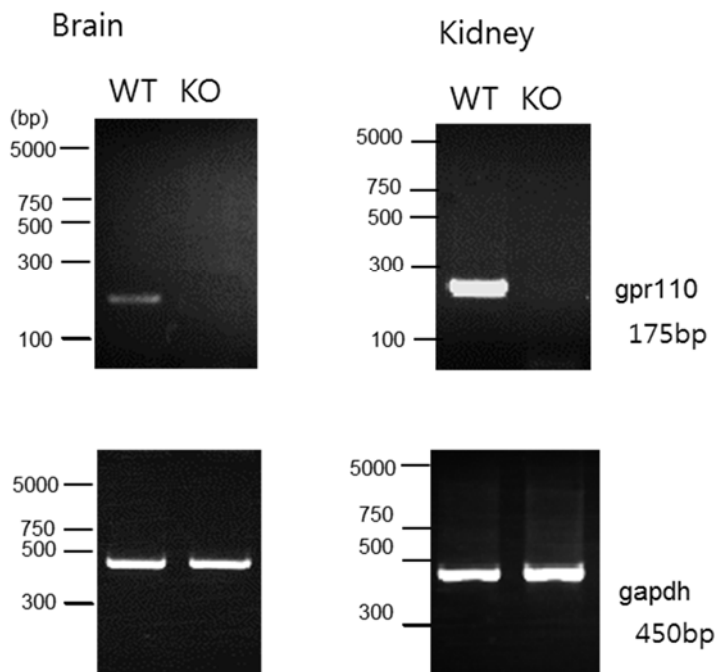

Fig. 5e.

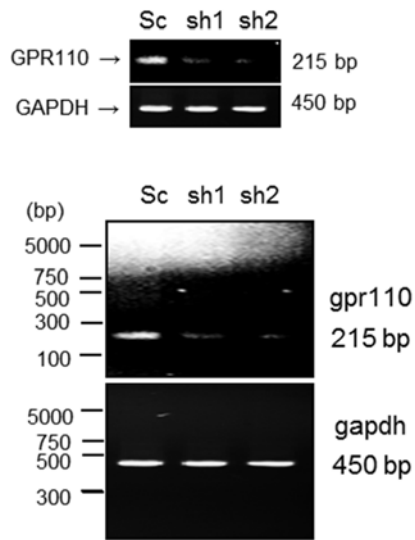

Fig. 5i.

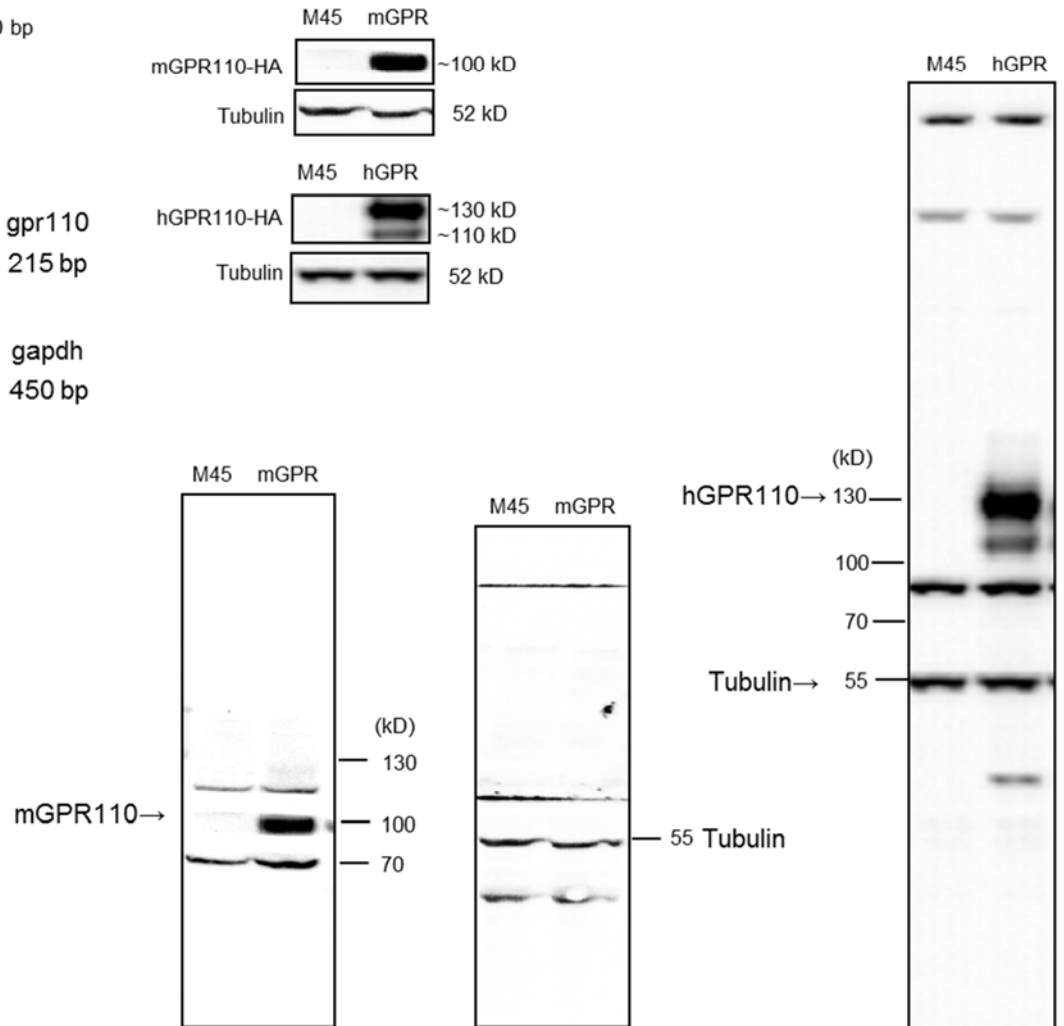

**Fig. S3**

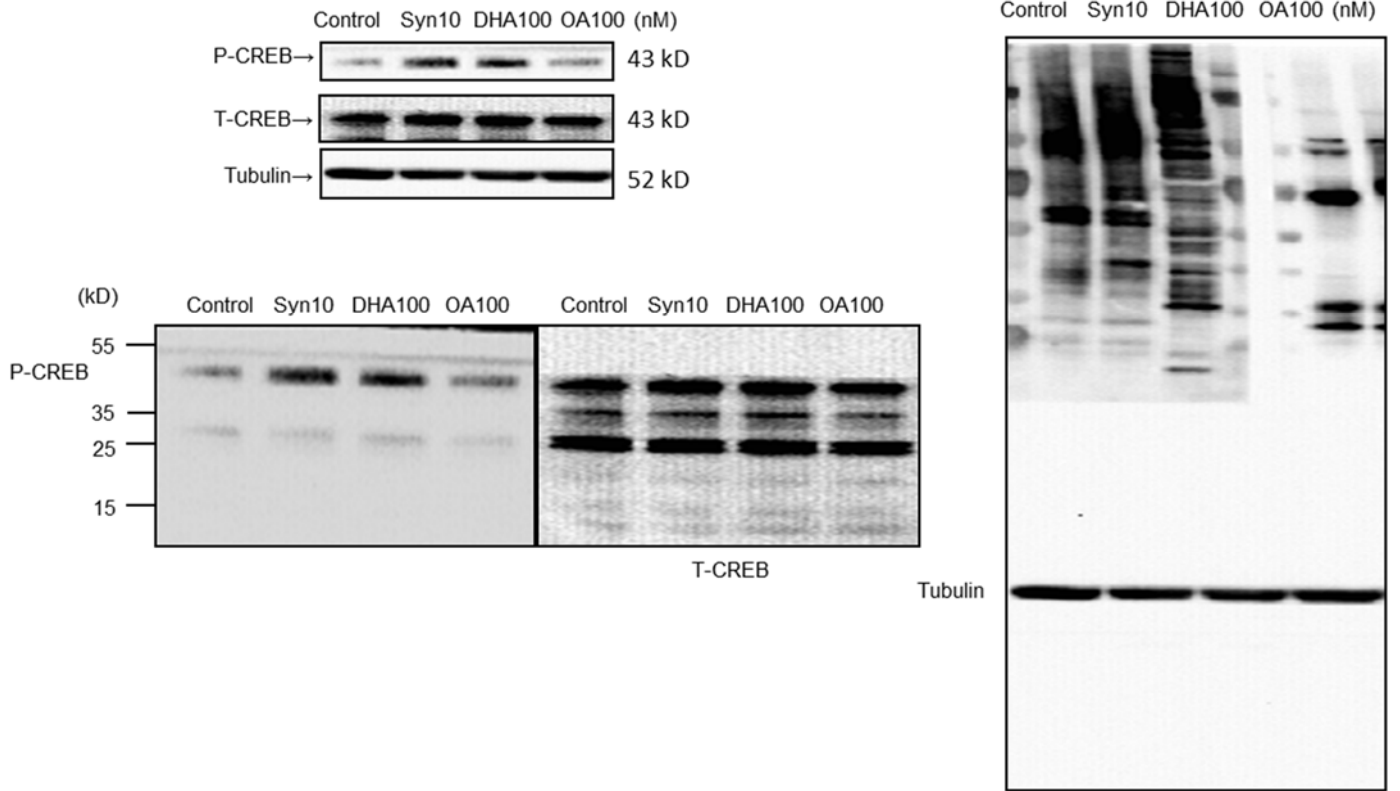

**Fig. S6**

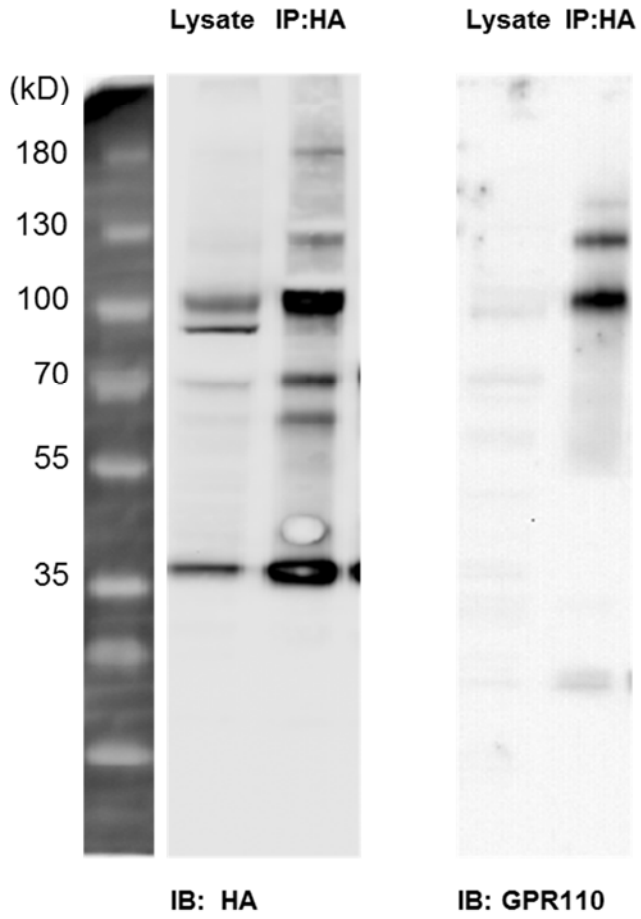

**Fig. S7a**

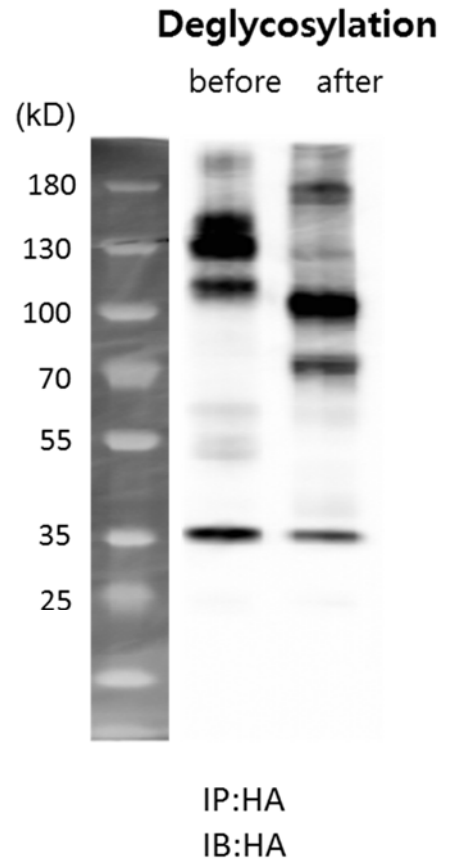



**Fig. S10**

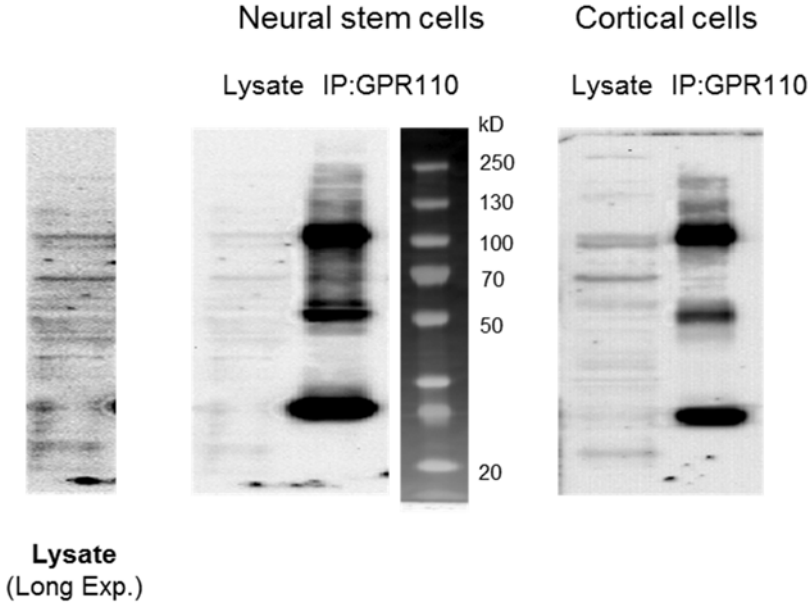

**Fig. S17**

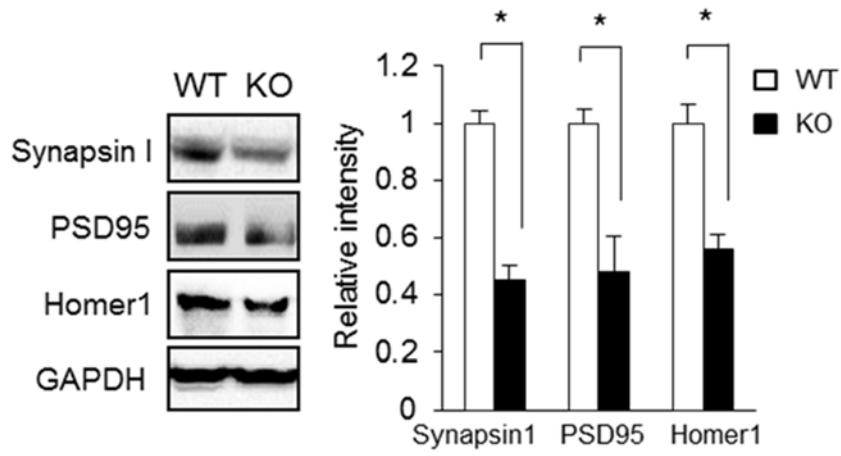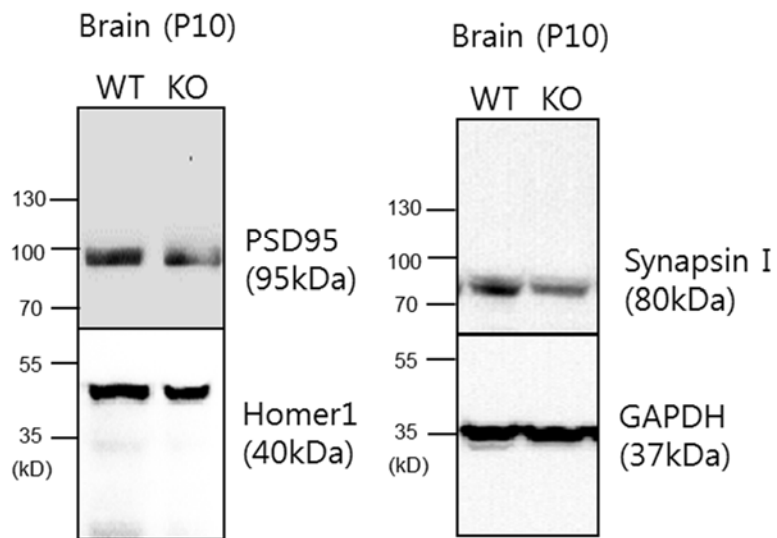

**Fig. S15**

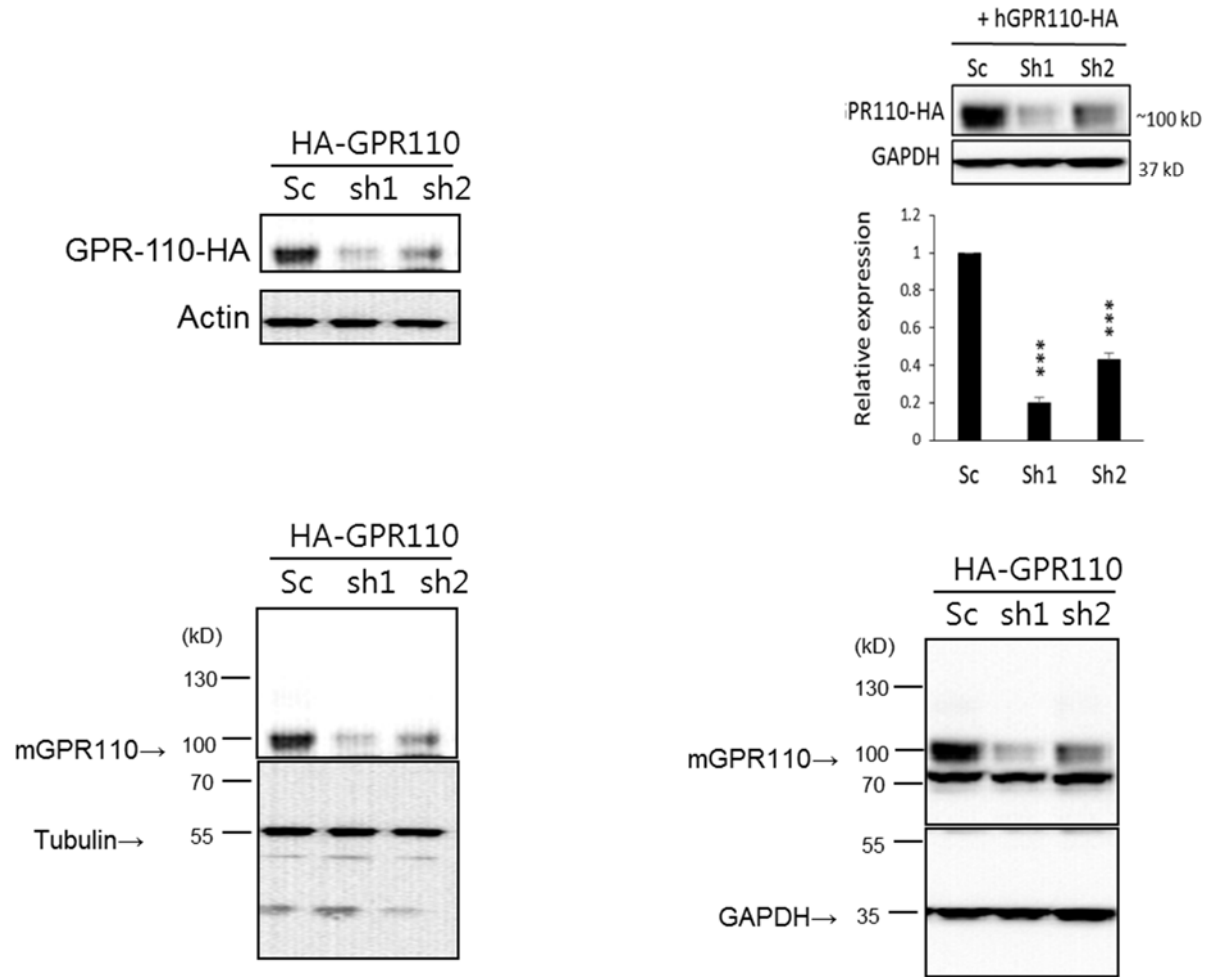

**Supplementary Table 1. Unique GPR110 peptides identified from fetal brain after affinity purification, SDSPAGE, in-gel digestion and mass spectrometric analysis**

| prot_acc #  | prot_desc                      | prot_Score | prot_Mass | prot_Match_sig | pep_Rank | pep_Is_bold | pep_Is_unique | pep_exp_m/z | pep_exp_Mr | pep_exp_z | pep_calc_Mr | pep_error | pep_Score | pep_Expect | pep_res_before | pep_seq     | pep_res_after |
|-------------|--------------------------------|------------|-----------|----------------|----------|-------------|---------------|-------------|------------|-----------|-------------|-----------|-----------|------------|----------------|-------------|---------------|
| gi 17512539 | G protein-coupled receptor 110 | 86         | 102829    | 3              | 1        | 1           | 1             | 594.3187    | 1186.623   | 2         | 1186.631    | -0.0077   | 62.97     | 2.80E-06   | K              | GTPVTQIQSTR | G             |
| gi 17512539 | G protein-coupled receptor 110 | 86         | 102829    | 3              | 1        | 1           | 1             | 722.8595    | 1443.705   | 2         | 1443.715    | -0.0102   | 40.49     | 0.00027    | R              | GHVFIQDFQK  | S             |

**Supplementary Table 2. Unique peptides of mGPR110 (gi/17512539) overexpressed in HEK cells identified from ~ 100 kD band (band 2 in supplementary Fig. 6) by mass spectrometry**

| pep_exp_m/z | pep_exp_mr | exp_z | pep_calc_mr | pep_error | pep_score | pep_expect | pep_sequence                            | pep_var_mod     |
|-------------|------------|-------|-------------|-----------|-----------|------------|-----------------------------------------|-----------------|
| 468.2635    | 934.5124   | 2     | 934.5124    | 0         | 32.04     | 0.00099    | K.LTTLSSWK.Q                            |                 |
| 514.7851    | 1027.5556  | 2     | 1027.556    | -0.0007   | 33.46     | 0.0018     | R.TFNILQHR.G                            |                 |
| 546.2733    | 1090.5321  | 2     | 1090.533    | -0.0007   | 31.04     | 0.012      | K.EIVSMVEER.H                           |                 |
| 594.322     | 1186.6295  | 2     | 1186.631    | -0.0011   | 33.27     | 0.005      | K.GTPVTQIQSTR.G                         |                 |
| 596.2494    | 1190.4842  | 2     | 1190.485    | -0.0006   | 47.46     | 3.50E-05   | R.GYNYQMEMR.Q                           |                 |
| 611.7843    | 1221.554   | 2     | 1221.556    | -0.0021   | 50.25     | 0.00032    | R.CQSSGWQITR.E                          |                 |
| 612.2443    | 1222.4741  | 2     | 1222.475    | -0.0006   | 44.97     | 6.60E-05   | R.GYNYQMEMR.Q                           | 2 Oxidation (M) |
| 717.8599    | 1433.7053  | 2     | 1433.707    | -0.0019   | 51.79     | 0.00045    | R.ESCVLSQLEELK.K                        |                 |
| 718.8158    | 1435.6171  | 2     | 1435.619    | -0.0019   | 75.95     | 8.20E-08   | R.NDVCWLNWSDK.S                         |                 |
| 722.8641    | 1443.7137  | 2     | 1443.715    | -0.0009   | 45.42     | 0.00033    | R.GHVFIQPDQFQK.S                        |                 |
| 781.9081    | 1561.8017  | 2     | 1561.802    | -0.0004   | 44.1      | 0.0019     | R.ESCVLSQLEELK.E                        |                 |
| 796.866     | 1591.7175  | 2     | 1591.72     | -0.0026   | 67.54     | 1.40E-06   | K.RNDVCWLNWSDK.S                        |                 |
| 626.3351    | 1875.9835  | 3     | 1875.984    | -0.0008   | 38.95     | 0.0018     | K.FIDWKGTPVTQIQSTR.G                    |                 |
| 628.3323    | 1881.9749  | 3     | 1881.974    | 0.0012    | 52.61     | 8.50E-05   | R.HPVHEYEVLLQVTYR.D                     |                 |
| 1047.0707   | 2092.1268  | 2     | 2092.124    | 0.003     | 75.33     | 1.00E-07   | K.TIISMASLTFGDILPITQR.G                 | Oxidation (M)   |
| 1111.0948   | 2220.175   | 2     | 2220.171    | 0.0039    | 38.81     | 0.0025     | K.TLESISLIPSMALPLNFSGK.F                | Oxidation (M)   |
| 621.0648    | 2480.2303  | 4     | 2480.234    | -0.0033   | 35.8      | 0.0047     | R.HPVHEYEVLLQVTYRDPEEK.R                |                 |
| 848.1269    | 2541.359   | 3     | 2541.363    | -0.0035   | 21.29     | 0.011      | K.SHPKTIISMASLTFGDILPITQR.G             | Oxidation (M)   |
| 1334.6648   | 2667.315   | 2     | 2667.311    | 0.004     | 63.52     | 1.10E-06   | R.CSHLTSFSMLMSPFVPSVVVVK.W              | 2 Oxidation (M) |
| 992.7772    | 3967.0799  | 4     | 3967.067    | 0.0133    | 17.92     | 0.045      | R.GHVFIQPDQFQKSHPKTIISMASLTFGDILPITQR.G | Oxidation (M)   |

**Supplementary Table 3. Unique peptides of mGPR110 (gi/17512539) overexpressed in HEK cells identified from ~130 kD band (band 1 in supplementary Fig. 6) by mass spectrometry**

| pep_exp_m/z | pep_exp_mr | exp_z | pep_calc_mr | pep_error | pep_score | pep_expect | pep_sequence             | pep_var_mod   |
|-------------|------------|-------|-------------|-----------|-----------|------------|--------------------------|---------------|
| 468.2631    | 934.5117   | 2     | 934.5124    | -0.0007   | 25.78     | 0.0038     | K.LTTLSSWK.Q             |               |
| 546.273     | 1090.531   | 2     | 1090.533    | -0.0014   | 34.07     | 0.0088     | K.EIVSMVEER.H            |               |
| 594.3225    | 1186.63    | 2     | 1186.631    | -0.0002   | 37.26     | 0.0013     | K.GTPVTQIQSTR.G          |               |
| 596.2491    | 1190.484   | 2     | 1190.485    | -0.0013   | 44.36     | 6.90E-05   | R.GYNYQMEMR.Q            |               |
| 718.8159    | 1435.617   | 2     | 1435.619    | -0.0018   | 43.11     | 9.10E-05   | R.NDVCVLNWSDK.S          |               |
| 722.863     | 1443.711   | 2     | 1443.715    | -0.0033   | 31.83     | 0.001      | R.GHVFIEPDQFQK.S         |               |
| 781.9067    | 1561.799   | 2     | 1561.802    | -0.0033   | 36.1      | 0.0014     | R.ESCVLSQLEELKK.E        |               |
| 628.3304    | 1881.97    | 3     | 1881.974    | -0.0042   | 18.51     | 0.018      | R.HPVHEYEVLLQVTYR.D      |               |
| 1047.068    | 2092.121   | 2     | 2092.124    | -0.0032   | 55.79     | 6.10E-06   | K.TIISMASLTFGDILPITQR.G  | Oxidation (M) |
| 1111.091    | 2220.167   | 2     | 2220.171    | -0.0039   | 23.82     | 0.007      | K.TLESISLIPSMALPLNFSGK.F | Oxidation (M) |

Supplementary Table 4. Unique hGPR110 (gi/61743940) peptides identified by mass spectrometry from ~ 130 kD band (band 1 in supplementary Fig. 7)

| pep_exp_m/z | pep_exp_mr | exp_z | pep_calc_mr | pep_error | pep_score | pep_expect | pep_sequence                    | pep_var_mod   |
|-------------|------------|-------|-------------|-----------|-----------|------------|---------------------------------|---------------|
| 376.2103    | 750.4061   | 2     | 750.4065    | -0.0004   | 17.85     | 0.032      | K.IWGTFK.I                      |               |
| 446.2498    | 890.485    | 2     | 890.4861    | -0.0011   | 37.41     | 0.0026     | K.LSALSSWK.Q                    |               |
| 327.523     | 979.5471   | 3     | 979.5491    | -0.002    | 21.58     | 0.022      | R.TKIWGTFK.I                    |               |
| 574.8182    | 1147.622   | 2     | 1147.624    | -0.0018   | 44.47     | 0.0054     | K.YANGIEIQLK.K                  |               |
| 581.8138    | 1161.613   | 2     | 1161.614    | -0.0012   | 47.28     | 0.0012     | R.VLIGSDQFQR.S                  |               |
| 590.8023    | 1179.59    | 2     | 1179.592    | -0.0024   | 43.41     | 0.001      | K.LFPLEDGSFR.V                  |               |
| 611.2861    | 1220.558   | 2     | 1220.561    | -0.0032   | 66.39     | 1.90E-05   | K.CESSGWQVIR.E                  |               |
| 426.2464    | 1275.718   | 3     | 1275.719    | -0.0012   | 30.79     | 0.0083     | K.YANGIEIQLK.A                  |               |
| 660.3576    | 1318.701   | 2     | 1318.703    | -0.0028   | 25.11     | 0.014      | K.FSKPFNPLQNK.G                 |               |
| 721.8376    | 1441.661   | 2     | 1441.666    | -0.0054   | 83.57     | 1.50E-08   | K.AQCNDIVFGFGSK.D               |               |
| 769.8999    | 1537.785   | 2     | 1537.789    | -0.0036   | 66.08     | 2.20E-06   | R.IQGFESVQTQFR.N                |               |
| 774.4026    | 1546.791   | 2     | 1546.791    | -0.0005   | 80.87     | 1.20E-06   | R.ETCVLSLLELNK.N                |               |
| 781.8246    | 1561.635   | 2     | 1561.636    | -0.0009   | 44.59     | 6.60E-05   | K.DDEYTLPCSSGYR.G               |               |
| 817.9656    | 1633.917   | 2     | 1633.919    | -0.0025   | 81.69     | 2.20E-08   | R.QLLFNKLSALSSWK.Q              |               |
| 548.3423    | 1642.005   | 3     | 1642.008    | -0.003    | 49.32     | 2.40E-05   | K.LLKPLLSHGLIR.I                |               |
| 577.644     | 1729.91    | 3     | 1729.915    | -0.005    | 45.43     | 7.90E-05   | K.TALHKLPLEDGSFR.V              |               |
| 1029.553    | 2057.092   | 2     | 2057.095    | -0.0025   | 114.13    | 2.00E-11   | K.HLGPVEEYQLLQVTYR.D            |               |
| 1093.603    | 2185.191   | 2     | 2185.19     | 0.0011    | 100.29    | 4.00E-10   | K.KHLGPVEEYQLLQVTYR.D           |               |
| 1150.642    | 2299.268   | 2     | 2299.271    | -0.0024   | 48.42     | 2.90E-05   | R.SLPETIISMASLTGNILPVSK.N       | Oxidation (M) |
| 796.755     | 2387.243   | 3     | 2387.249    | -0.0054   | 32.75     | 0.00099    | K.HLGPVEEYQLLQVTYRDSK.E         |               |
| 629.842     | 2515.339   | 4     | 2515.343    | -0.0045   | 23.82     | 0.023      | K.KHLGPVEEYQLLQVTYRDSK.E        |               |
| 662.1032    | 2644.384   | 4     | 2644.386    | -0.0024   | 27.01     | 0.0053     | K.HLGPVEEYQLLQVTYRDSKEK.R       |               |
| 1493.653    | 2985.292   | 2     | 2985.291    | 0.0013    | 68.24     | 4.00E-07   | K.AQCNDIVFGFGSKDDEYTLPCSSGYR.G  |               |
| 1033.885    | 3098.632   | 3     | 3098.636    | -0.004    | 26.01     | 0.0036     | R.QNPSTTVGNLASVVSILSNISLASHFR.V |               |

**Supplementary Table 5. Unique hGPR110 (gi/61743940) peptides identified by mass spectrometry from ~ 110 kD band (band 2 in supplementary Fig. 7)**

| pep_exp_m/z | pep_exp_mr | exp_z | pep_calc_mr | pep_error | pep_score | pep_expect | pep_sequence                      | pep_var_mod   |
|-------------|------------|-------|-------------|-----------|-----------|------------|-----------------------------------|---------------|
| 446.2498    | 890.485    | 2     | 890.4861    | -0.0011   | 34.21     | 0.0052     | K.LSALSSWK.Q                      |               |
| 557.3103    | 1112.606   | 2     | 1112.609    | -0.0031   | 32.53     | 0.0043     | K.LWRPTVGER.L                     |               |
| 574.8179    | 1147.621   | 2     | 1147.624    | -0.0025   | 58.29     | 3.30E-05   | K.YANGIEIQLK.K                    |               |
| 581.8128    | 1161.611   | 2     | 1161.614    | -0.0032   | 58.79     | 1.30E-05   | R.VLIGSDQFQR.S                    |               |
| 590.8018    | 1179.589   | 2     | 1179.592    | -0.0033   | 35.67     | 0.0063     | K.LFPLEDGSFR.V                    |               |
| 611.2871    | 1220.56    | 2     | 1220.561    | -0.0012   | 55.51     | 9.40E-05   | K.CESSGWQVIR.E                    |               |
| 660.3576    | 1318.701   | 2     | 1318.703    | -0.0026   | 19.48     | 0.029      | K.FSKPFNPLQNK.G                   |               |
| 721.8386    | 1441.663   | 2     | 1441.666    | -0.0033   | 71.33     | 2.10E-07   | K.AQCNDIVFGFGSK.D                 |               |
| 769.9001    | 1537.786   | 2     | 1537.789    | -0.0033   | 70.11     | 9.70E-07   | R.IQGFESVQVTQFR.N                 |               |
| 774.4017    | 1546.789   | 2     | 1546.791    | -0.0024   | 82.89     | 2.20E-07   | R.ETCVLSLLELNK.N                  |               |
| 781.8235    | 1561.633   | 2     | 1561.636    | -0.0029   | 24.18     | 0.0054     | K.DDEYTLPCSSGYR.G                 |               |
| 822.0115    | 1642.009   | 2     | 1642.008    | 0.0002    | 37.2      | 0.00032    | K.LLKPPLLWSHGLIR.I                |               |
| 830.4144    | 1658.814   | 2     | 1658.815    | -0.001    | 83.61     | 4.60E-08   | R.FTNDLLNSSSAIYSK.Y               |               |
| 1029.555    | 2057.096   | 2     | 2057.095    | 0.0013    | 115.65    | 1.80E-11   | K.HLGPVEEYQLLQVTYR.D              |               |
| 1150.643    | 2299.272   | 2     | 2299.271    | 0.0012    | 82.72     | 3.00E-08   | R.SLPETIISMASLTGLNLPVSK.N         | Oxidation (M) |
| 968.4862    | 2902.437   | 3     | 2902.456    | -0.0191   | 26.81     | 0.0036     | R.NGSIVAGYEVVGGSSASELLSAIEHVAEK.A |               |
| 996.1024    | 2985.285   | 3     | 2985.291    | -0.0057   | 47.87     | 3.20E-05   | K.AQCNDIVFGFGSKDDEYTLPCSSGYR.G    |               |
| 1033.886    | 3098.636   | 3     | 3098.636    | -0.0004   | 42.87     | 0.00034    | R.QNPSTTVGNLASVVSILSNISLASHFR.V   |               |



Supplementary Table 6. Unique hGPR110 (gi/61743940) peptides identified by mass spectrometry from ~ 100 kD band (band 3 in supplementary Fig. 7)

| pep_exp_m/z | pep_exp_mr | exp_z | pep_calc_mr | pep_error | pep_score | pep_expect | pep_sequence                          | pep_var_mod   |
|-------------|------------|-------|-------------|-----------|-----------|------------|---------------------------------------|---------------|
| 446.2492    | 890.4838   | 2     | 890.4861    | -0.0023   | 36        | 0.0024     | K.LSALSSWK.Q                          |               |
| 371.8767    | 1112.608   | 3     | 1112.609    | -0.0009   | 26.73     | 0.019      | K.LWRPTVGER.L                         |               |
| 574.8178    | 1147.621   | 2     | 1147.624    | -0.0026   | 50.17     | 0.00023    | K.YANGIEIQLK.K                        |               |
| 581.8127    | 1161.611   | 2     | 1161.614    | -0.0033   | 68.56     | 2.20E-06   | R.VLIGSDQFQR.S                        |               |
| 590.8025    | 1179.59    | 2     | 1179.592    | -0.002    | 62.28     | 4.80E-05   | K.LFPLEDGSFR.V                        |               |
| 611.2854    | 1220.556   | 2     | 1220.561    | -0.0046   | 45.21     | 0.0018     | K.CESSGWQVIR.E                        |               |
| 638.865     | 1275.716   | 2     | 1275.719    | -0.0031   | 49.47     | 0.00041    | K.YANGIEIQLK.A                        |               |
| 660.3575    | 1318.7     | 2     | 1318.703    | -0.003    | 30.02     | 0.0049     | K.FSKPFNPLQNK.G                       |               |
| 721.8379    | 1441.661   | 2     | 1441.666    | -0.0048   | 59.3      | 2.80E-06   | K.AQCNDIVFGFGSK.D                     |               |
| 769.8985    | 1537.782   | 2     | 1537.789    | -0.0066   | 71.47     | 1.30E-06   | R.IQGFESVQVTQFR.N                     |               |
| 774.4009    | 1546.787   | 2     | 1546.791    | -0.004    | 82.86     | 5.60E-07   | R.ETCVLSLLEELNK.N                     |               |
| 781.8234    | 1561.632   | 2     | 1561.636    | -0.0032   | 55.17     | 6.70E-06   | K.DDEYTLPCSSGYR.G                     |               |
| 548.3421    | 1642.004   | 3     | 1642.008    | -0.0038   | 43.67     | 8.00E-05   | K.LLKPPLLWSHGLIR.I                    |               |
| 830.4126    | 1658.811   | 2     | 1658.815    | -0.0044   | 62.11     | 3.90E-06   | R.FTNDLLNSSSAIYSK.Y                   |               |
| 577.6451    | 1729.913   | 3     | 1729.915    | -0.0017   | 42.07     | 0.00011    | K.TALHKLFPLEDGSFR.V                   |               |
| 1029.553    | 2057.092   | 2     | 2057.095    | -0.0025   | 99.25     | 6.80E-10   | K.HLGPVEEYQLLLQVTYR.D                 |               |
| 729.4029    | 2185.187   | 3     | 2185.19     | -0.0028   | 56.95     | 5.20E-06   | K.KHLGPVEEYQLLLQVTYR.D                |               |
| 1150.642    | 2299.27    | 2     | 2299.271    | -0.0006   | 64.87     | 8.30E-07   | R.SLPETIISMASLTIGNILPVSK.N            | Oxidation (M) |
| 796.7554    | 2387.244   | 3     | 2387.249    | -0.0041   | 46.99     | 3.90E-05   | K.HLGPVEEYQLLLQVTYRDSK.E              |               |
| 662.103     | 2644.383   | 4     | 2644.386    | -0.0033   | 61.63     | 6.00E-06   | K.HLGPVEEYQLLLQVTYRDSKEK.R            |               |
| 1493.652    | 2985.289   | 2     | 2985.291    | -0.0019   | 55.71     | 6.00E-06   | K.AQCNDIVFGFGSKDDEYTLPCSSGYR.G        |               |
| 1033.885    | 3098.633   | 3     | 3098.636    | -0.0034   | 47.53     | 3.50E-05   | R.QNPSTTVGNLASVVSILSNISLASHFR.V       |               |
| 1148.629    | 3442.865   | 3     | 3442.875    | -0.0097   | 26.16     | 0.0035     | R.VLIGSDQFQRSPLPETIISMASLTIGNILPVSK.N | Oxidation (M) |
